# Supplementary material for: Parallel synthesis of condensed pyrimidine-thiones and their antitumor activities
Source: Research Square preprint supplement (doi:10.21203/rs.3.rs-2121388/v1), 2022-10-10
Supplement: Supplementary file 1 [file 341a5d9077b5fbc938842b2f.docx]

**SUPPORTING INFORMATION**

**Parallel synthesis of condensed pyrimidine-thiones and their antitumor activities**

Buer Song 1,2, Lifei Nie 1, Khurshed Bozorov 1,3, Rustamkhon Kuryazov 3,4, *, Haji Akber Aisa 1,2,[[1]](#footnote-1), Jiangyu Zhao 1,*

1 State Key Laboratory Basis of Xinjiang Indigenous Medicinal Plants Resource Utilization, Xinjiang Technical Institute of Physics and Chemistry, Chinese Academy of Sciences, South Beijing Rd 40-1, Urumqi, 830011, P.R. China

2 University of Chinese Academy of Sciences, 19 A Yuquan Rd, Beijing, 100049, P.R. China

3 Faculty of Chemistry, Samarkand State University, University blv. 15, Samarkand, 140104, Uzbekistan

4 Urgench State University, Kh. Olimjon st. 14, Urgench, 220100, Uzbekistan

**1H, 13C NMR spectrums and HRMS of compounds 12a-12aa and 13a-13aa**


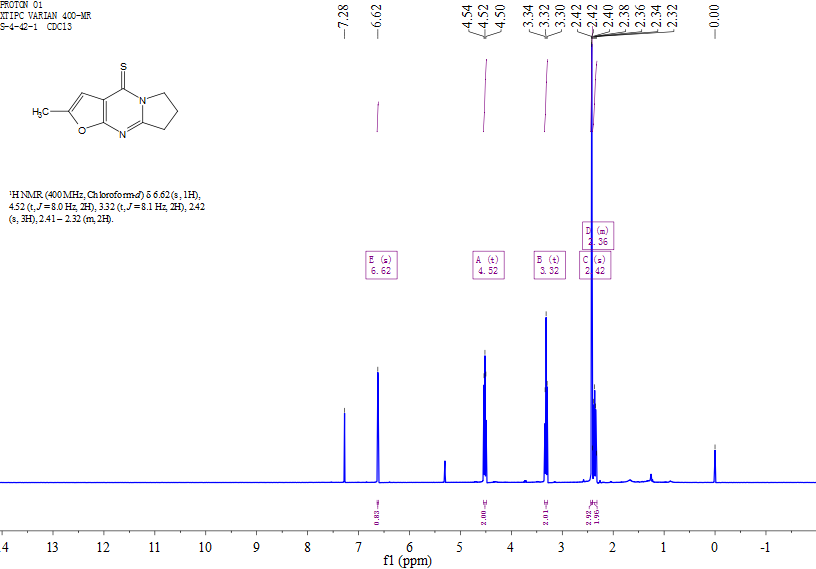


Figure S1. 1H NMR spectrum of **12a**

**
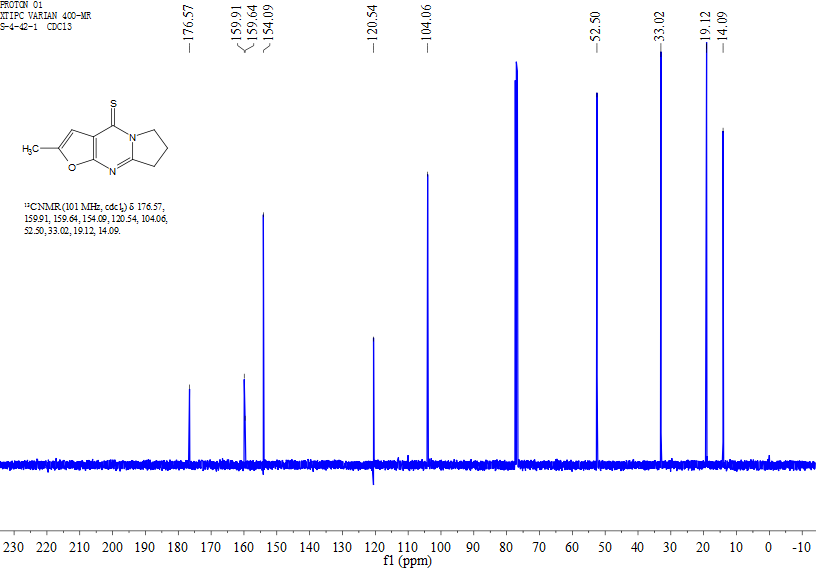
**

Figure S2. 13C NMR spectrum of **12a**

Figure S3. HRMS of **12a**


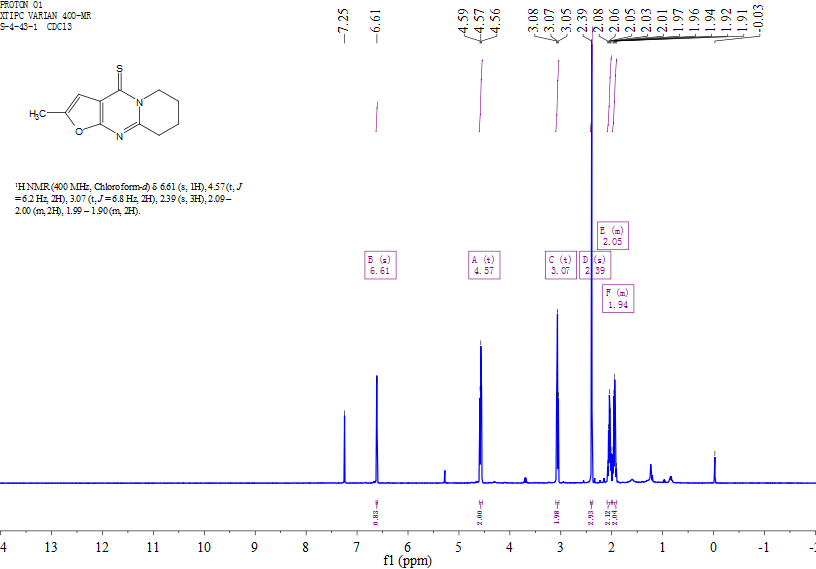


Figure S4. 1H NMR spectrum of **12b**

**
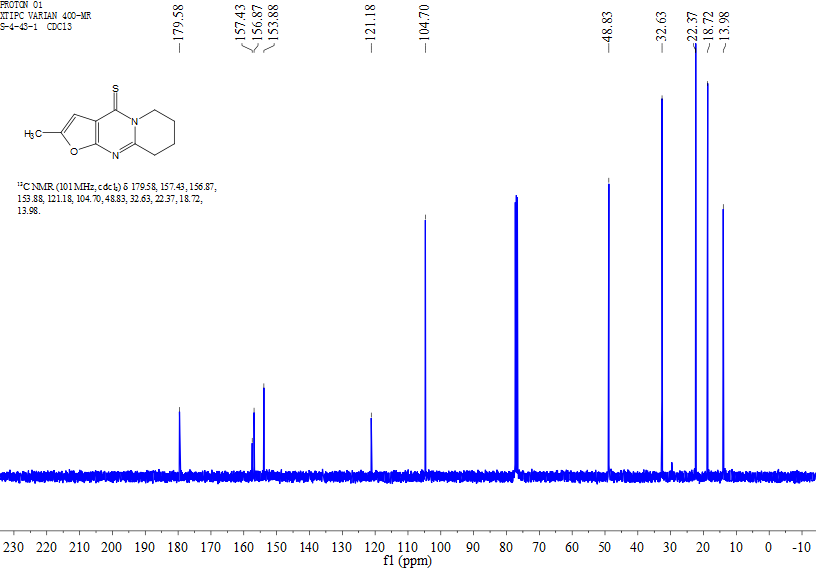
**

Figure S5. 13C NMR spectrum of **12b**

Figure S6. HRMS of **12b**


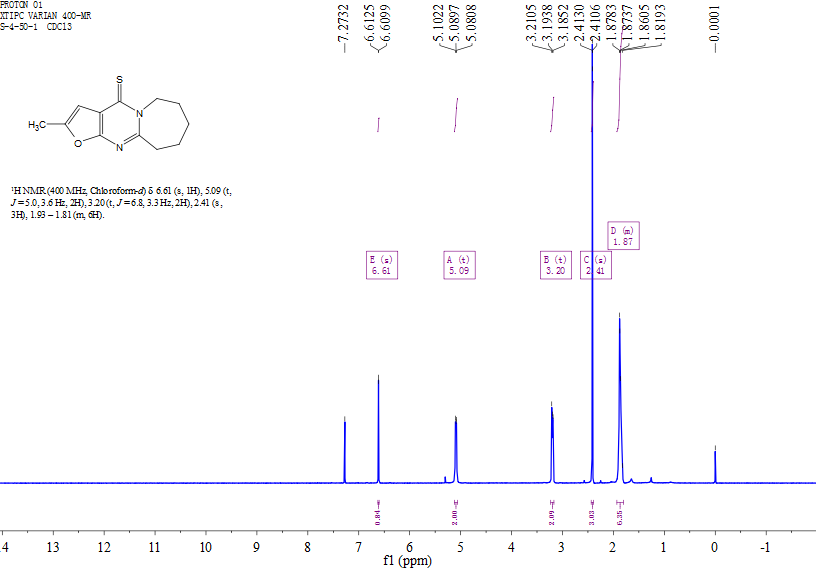


Figure S7. 1H NMR spectrum of **12c**

**
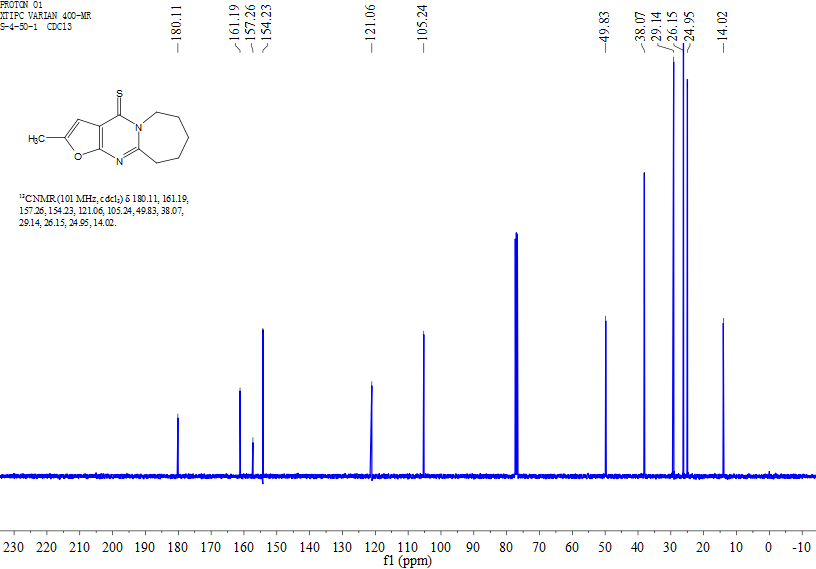
**

Figure S8. 13C NMR spectrum of **12c**

Figure S9. HRMS of **12c**


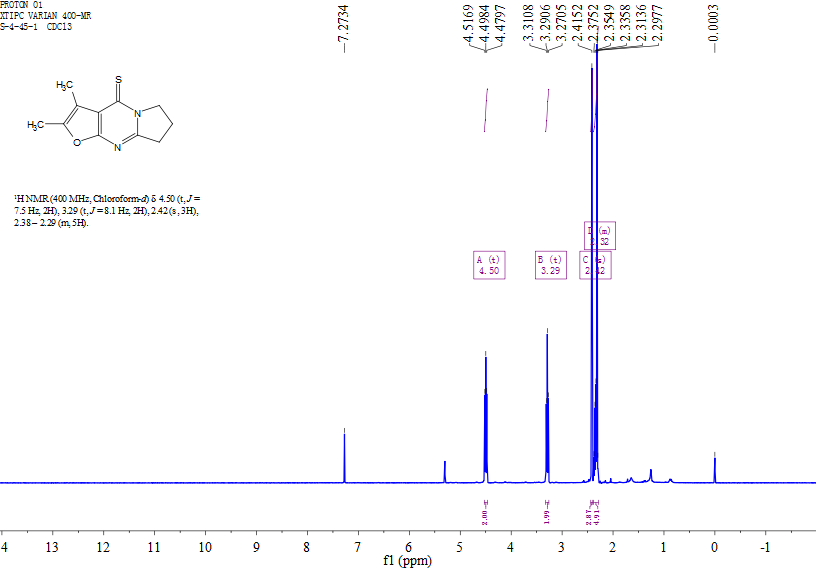


Figure S10. 1H NMR spectrum of **12d**

**
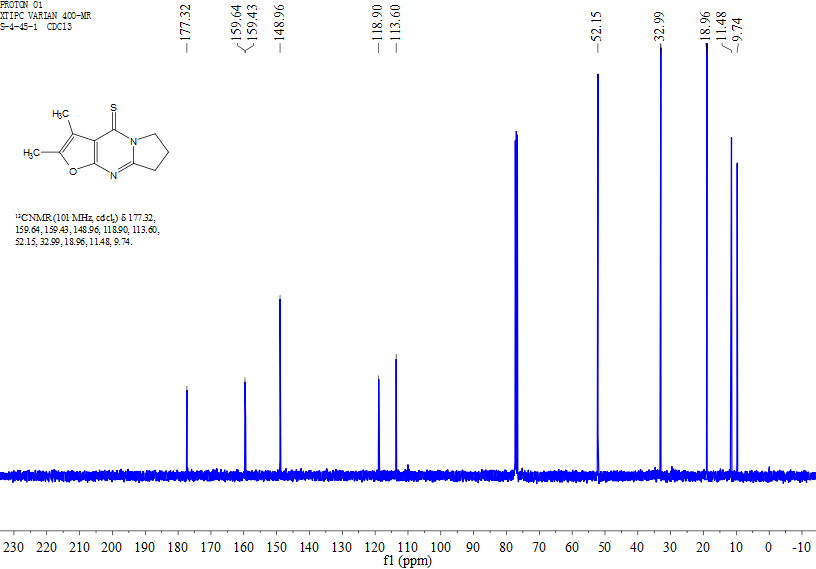
**

Figure S11. 13C NMR spectrum of **12d**

Figure S12. HRMS of **12d**


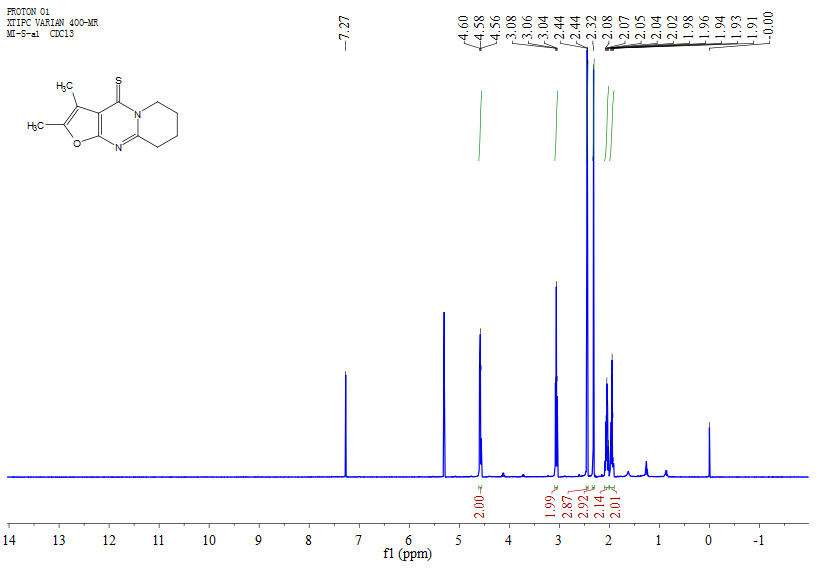


Figure S13. 1H NMR spectrum of **12e**

**
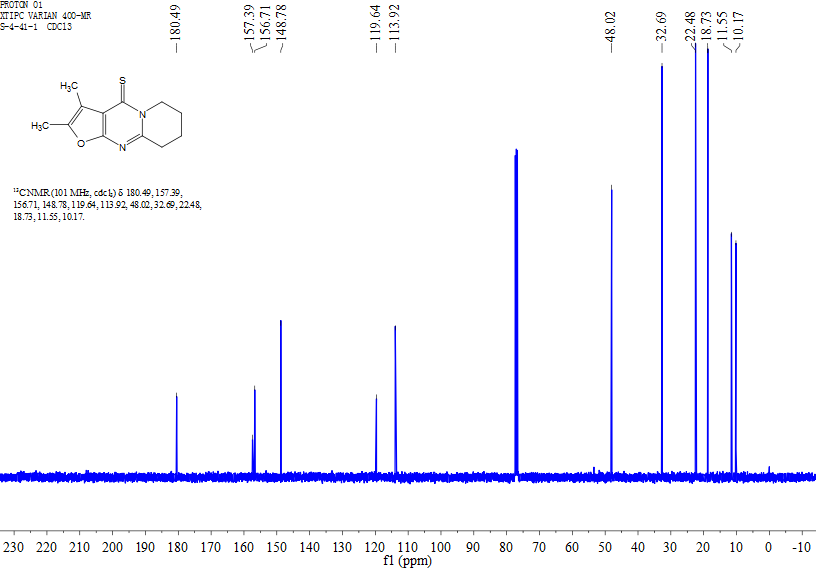
**

Figure S14. 13C NMR spectrum of **12e**

Figure S15. HRMS of **12e**


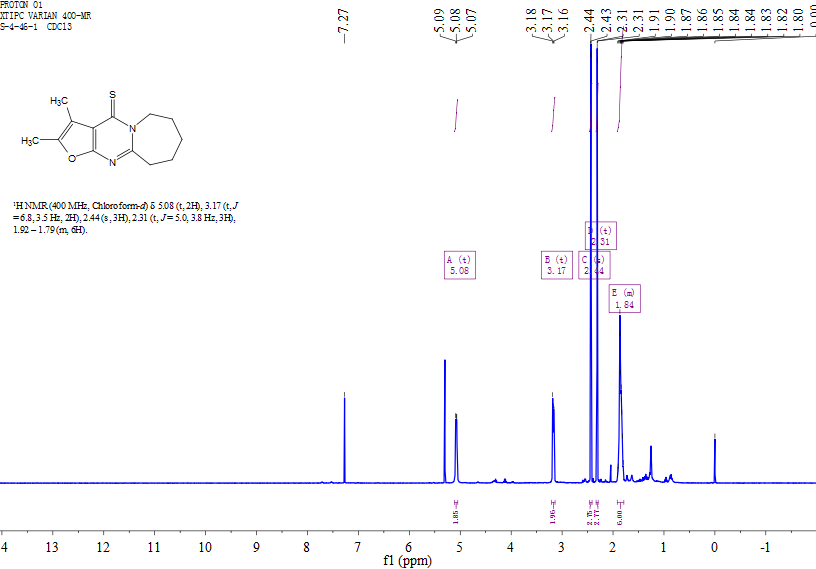


Figure S16. 1H NMR spectrum of **12f**

**
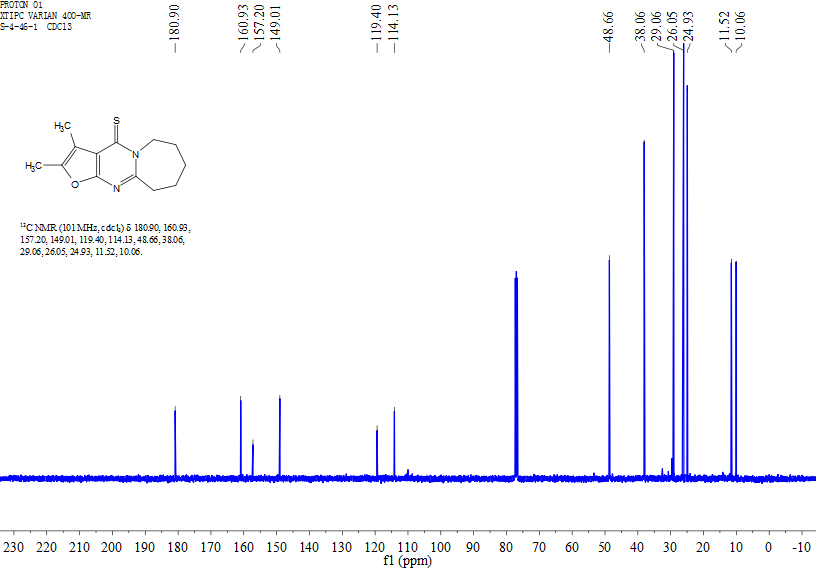
**

Figure S17. 13C NMR spectrum of **12f**

Figure S18. HRMS of **12f**


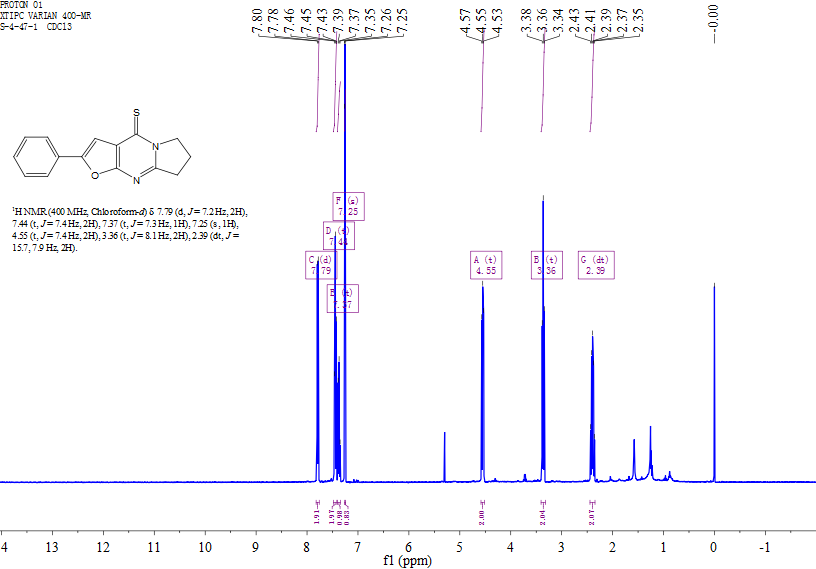


Figure S19. 1H NMR spectrum of **12g**

**
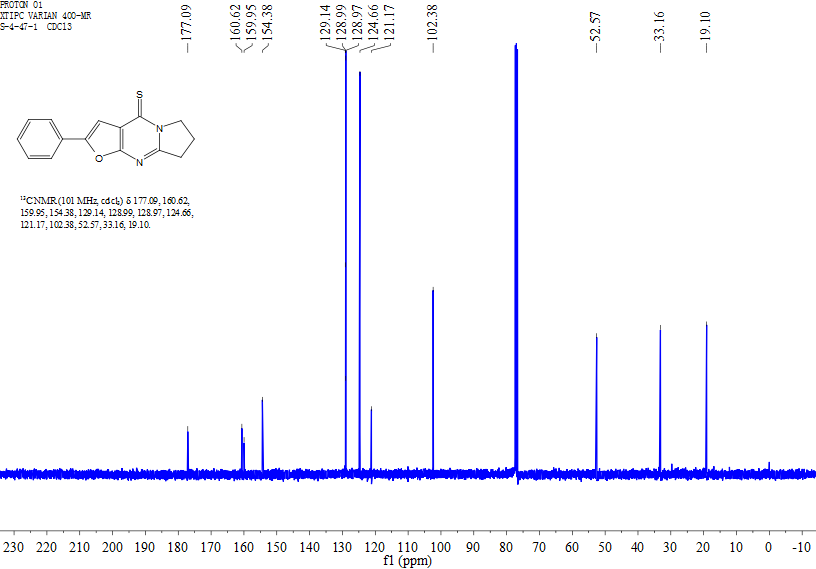
**

Figure S20. 13C NMR spectrum of **12g**

Figure S21. HRMS of **12g**


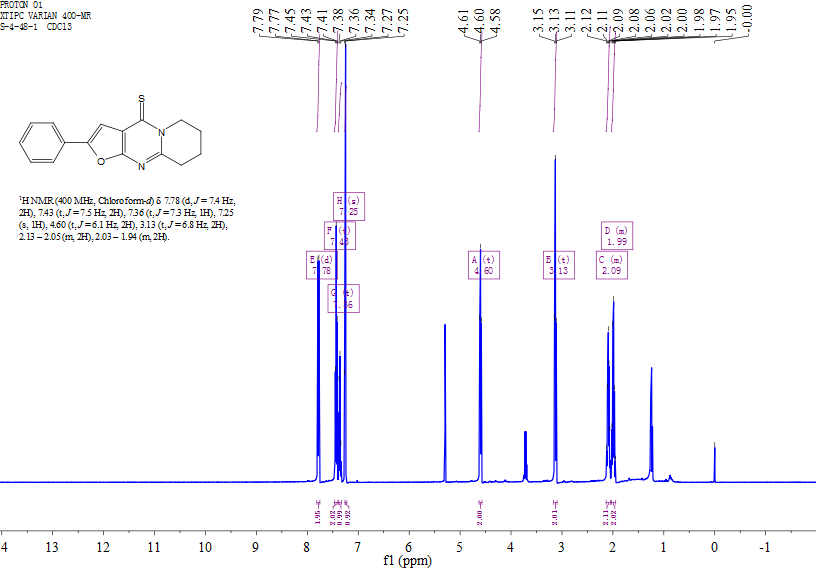


Figure S22. 1H NMR spectrum of **12h**

**
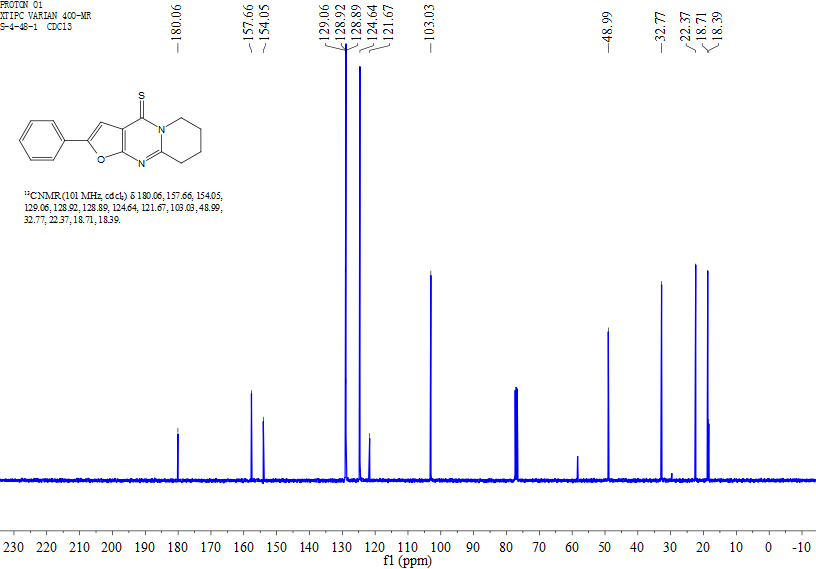
**

Figure S23. 13C NMR spectrum of **12h**

Figure S24. HRMS of **12h**


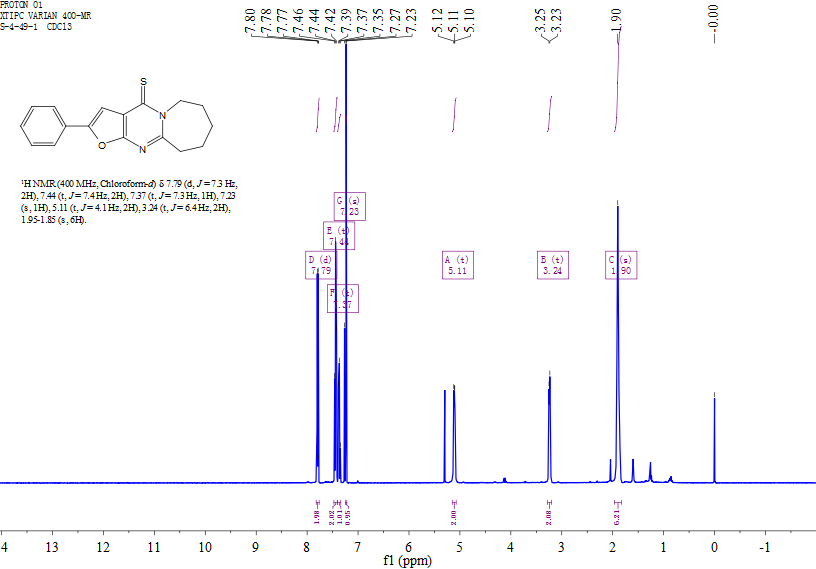


Figure S25. 1H NMR spectrum of **12i**

**
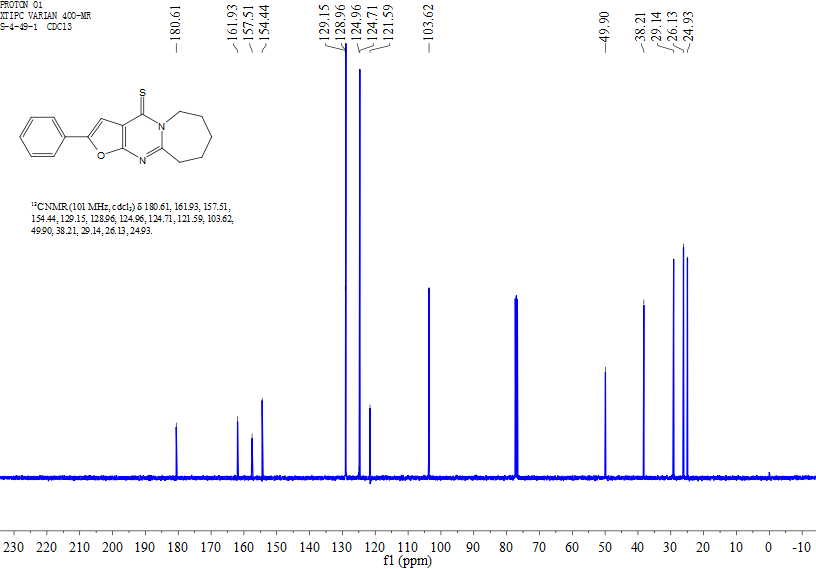
**

Figure S26. 13C NMR spectrum of **12i**

Figure S27. HRMS of **12i**


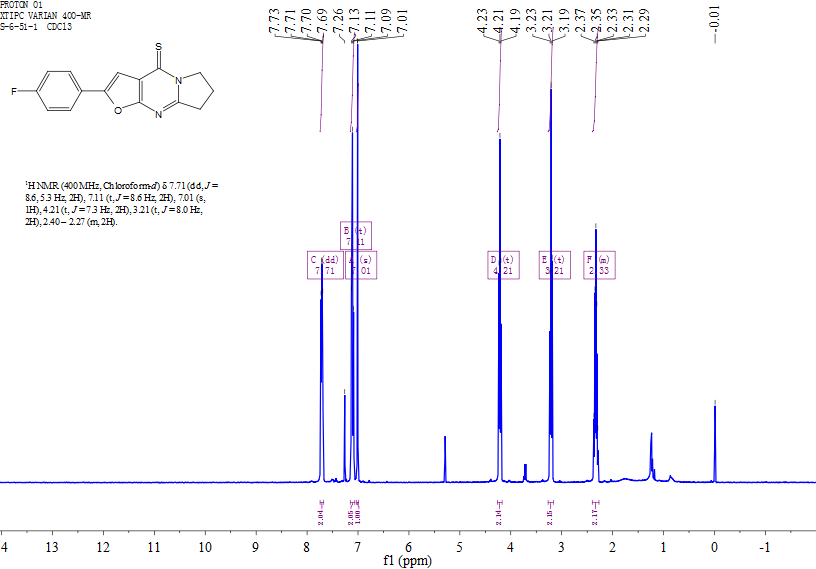


Figure S28. 1H NMR spectrum of **12j**

**
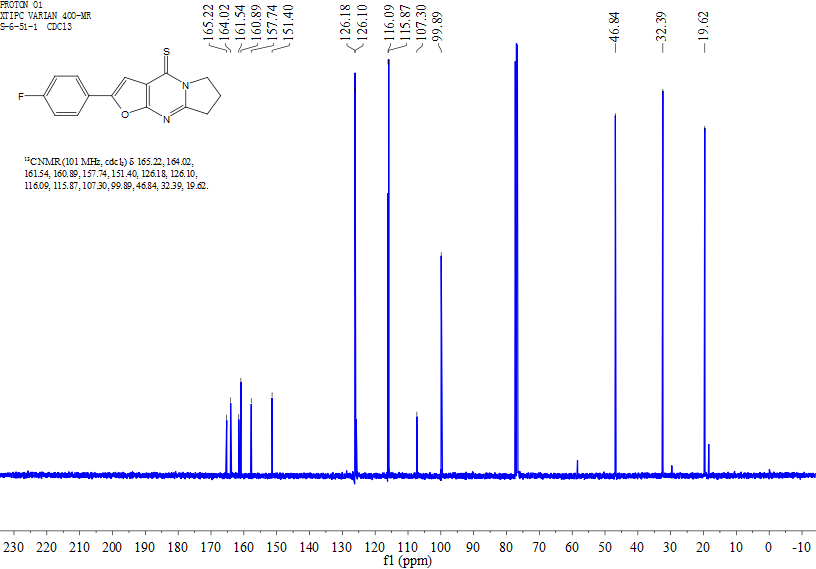
**

Figure S29. 13C NMR spectrum of **12j**

Figure S30. HRMS of **12j**


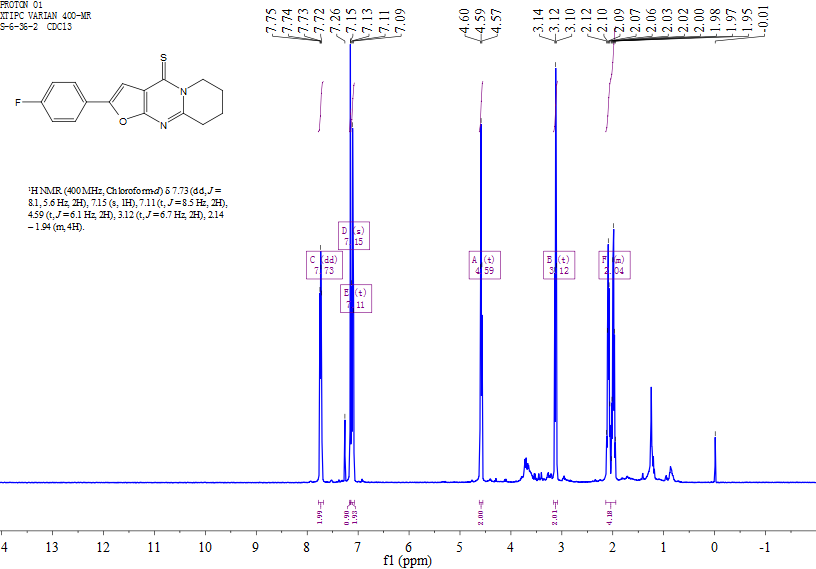


Figure S31. 1H NMR spectrum of **12k**

**
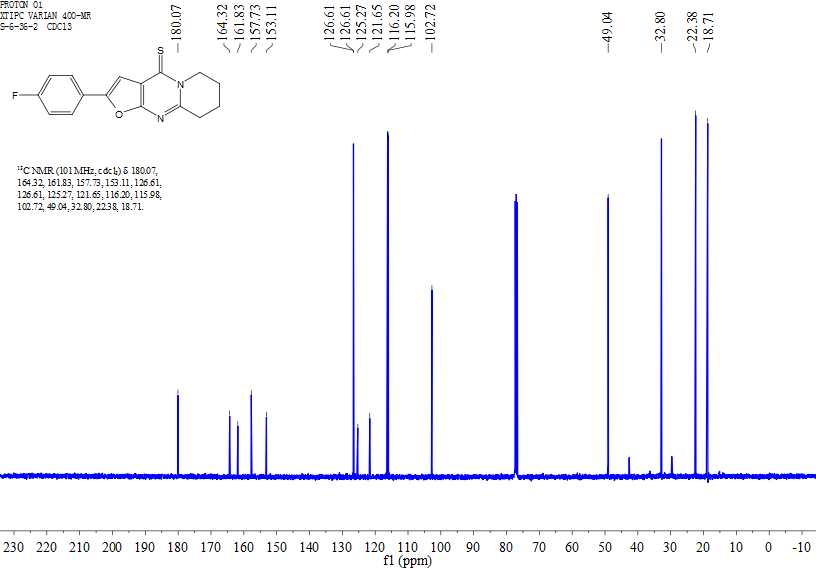
**

Figure S32. 13C NMR spectrum of **12k**

Figure S33. HRMS of **12k**


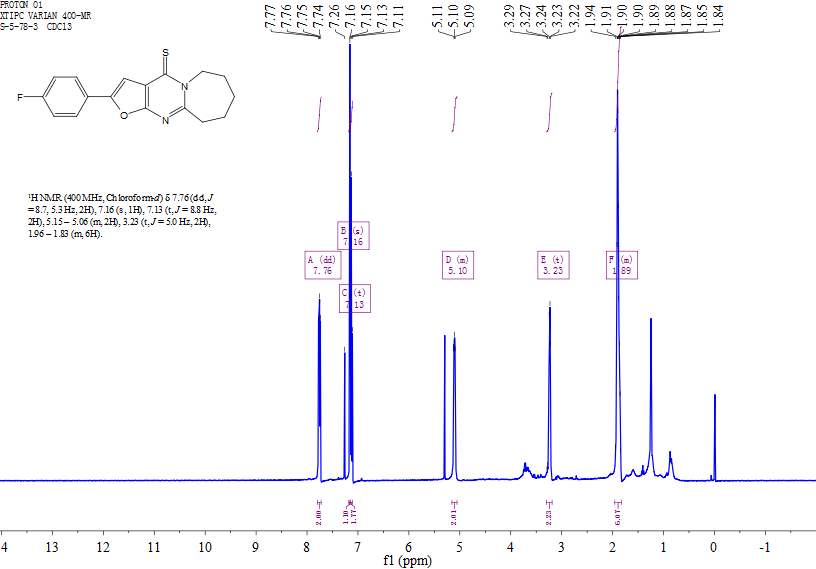


Figure S34. 1H NMR spectrum of **12l**

**
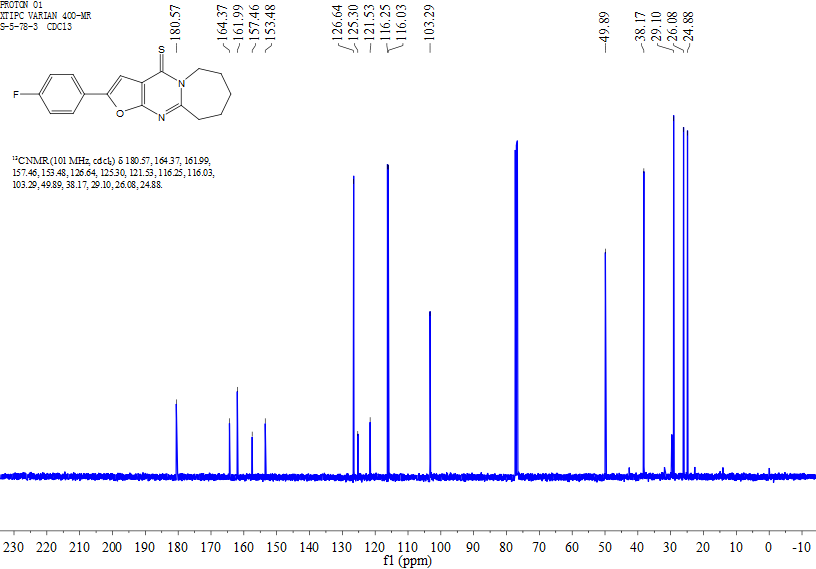
**

Figure S35. 13C NMR spectrum of **12l**

Figure S36. HRMS of **12l**


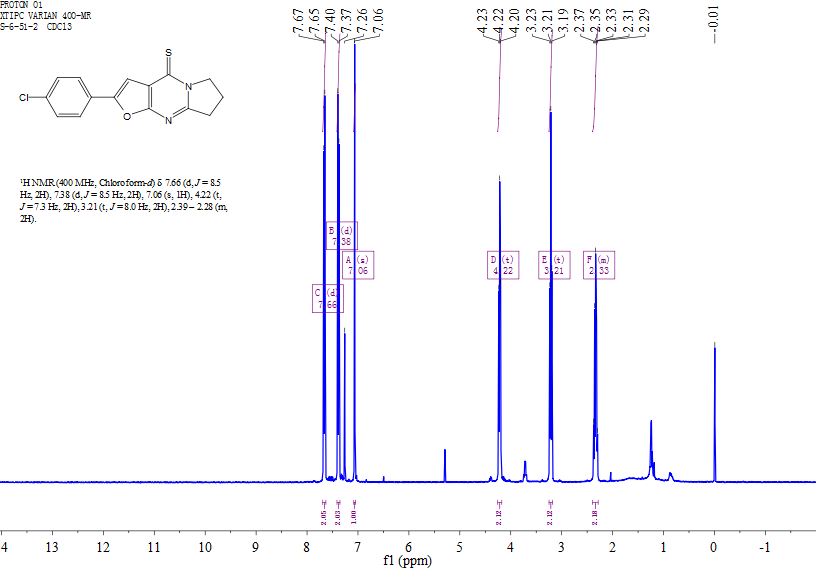


Figure S37. 1H NMR spectrum of **12m**

**
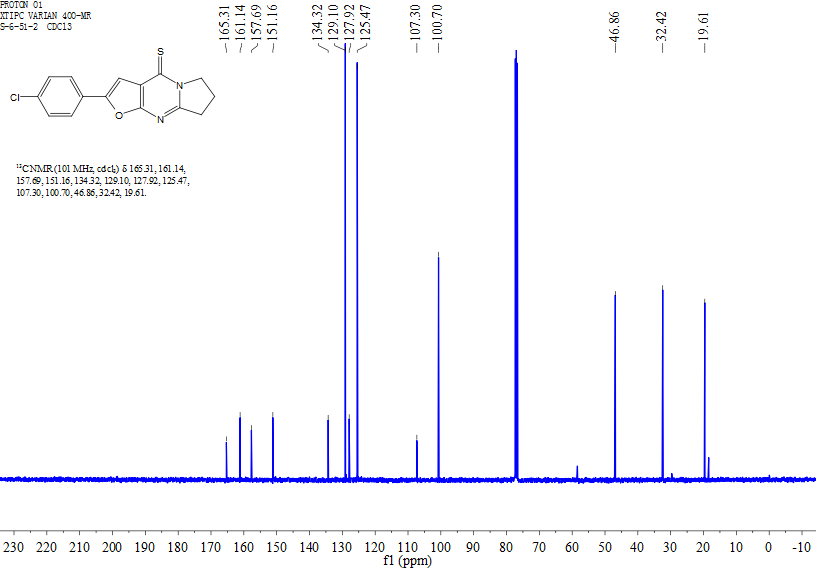
**

Figure S38. 13C NMR spectrum of **12m**

Figure S39. HRMS of **12m**


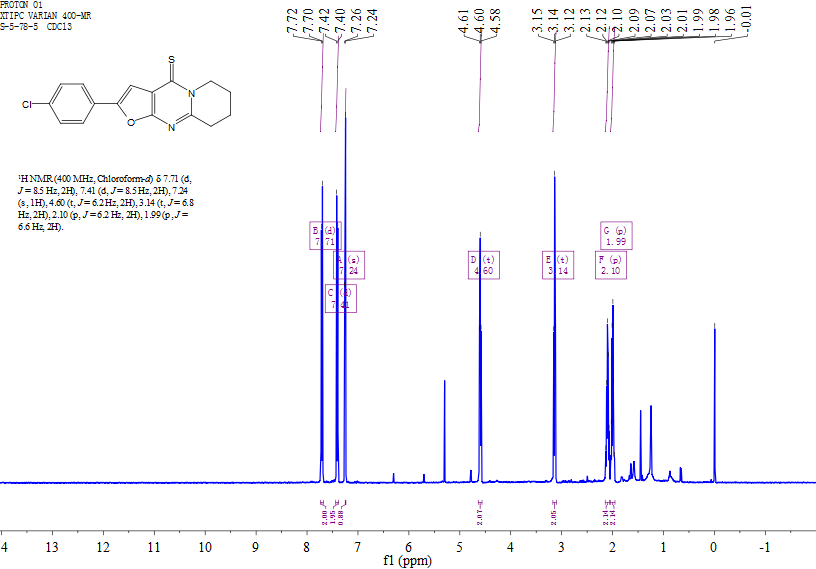


Figure S40. 1H NMR spectrum of **12n**

**
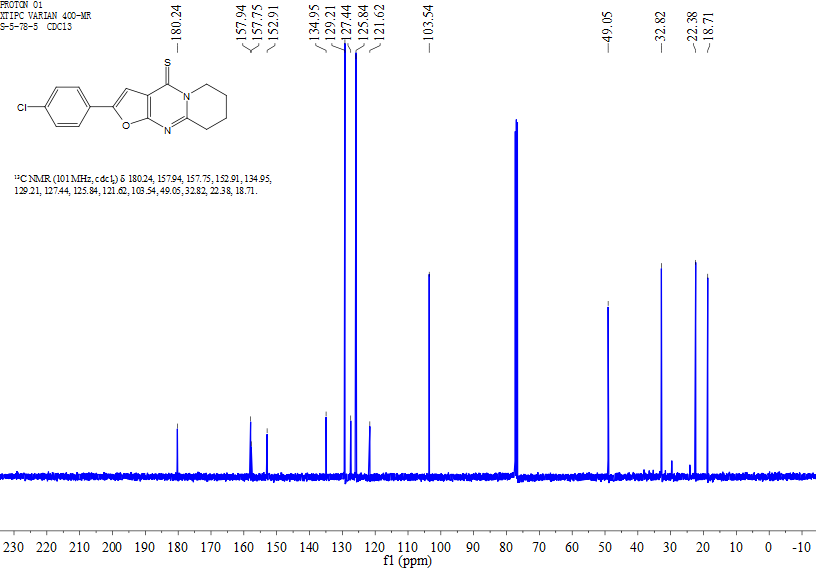
**

Figure S41. 13C NMR spectrum of **12n**

Figure S42. HRMS of **12n**


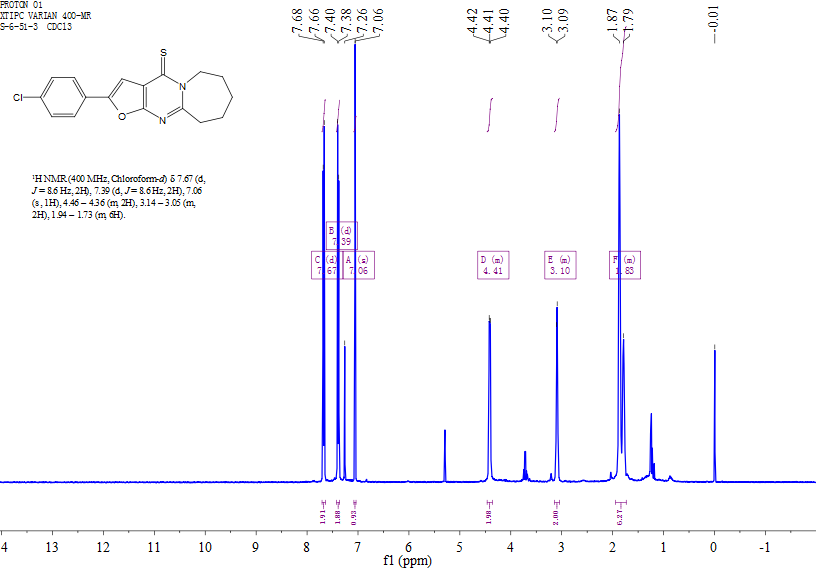


Figure S43. 1H NMR spectrum of **7o**

**
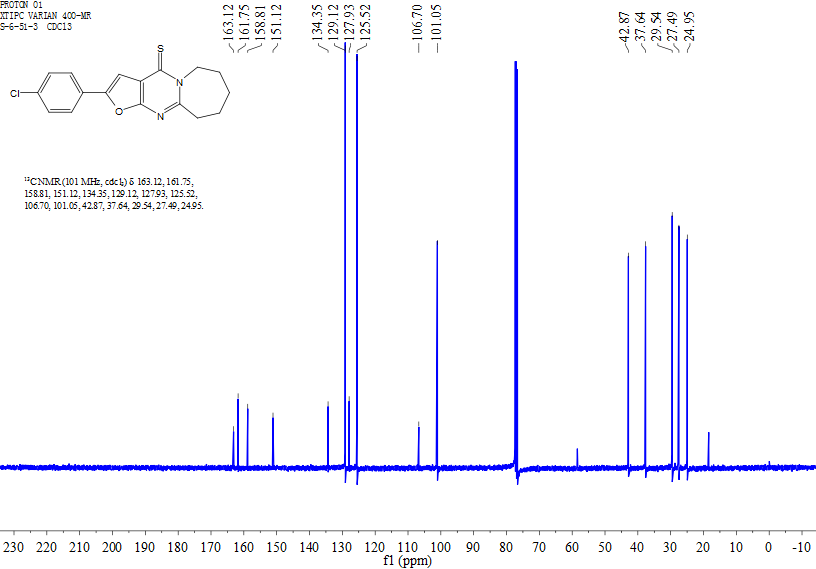
**

Figure S44. 13C NMR spectrum of **7o**

Figure S45. HRMS of **12o**


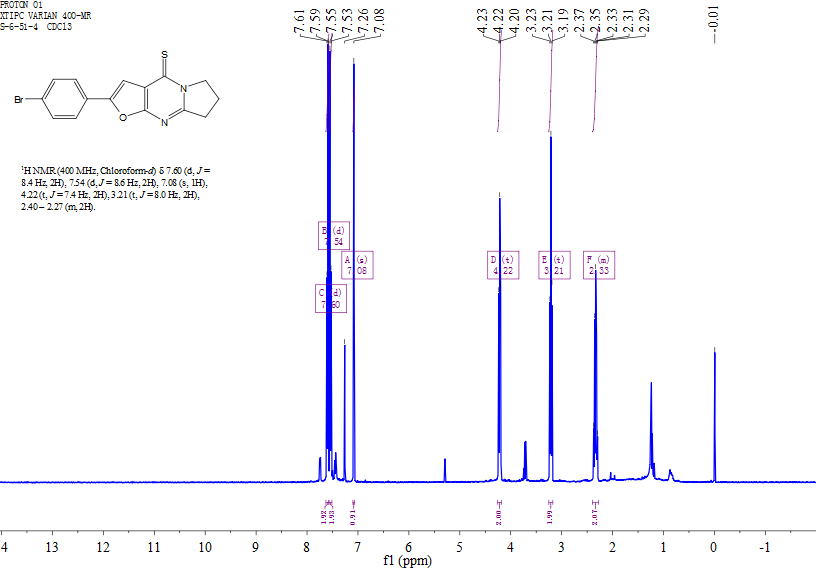


Figure S46. 1H NMR spectrum of **12p**

**
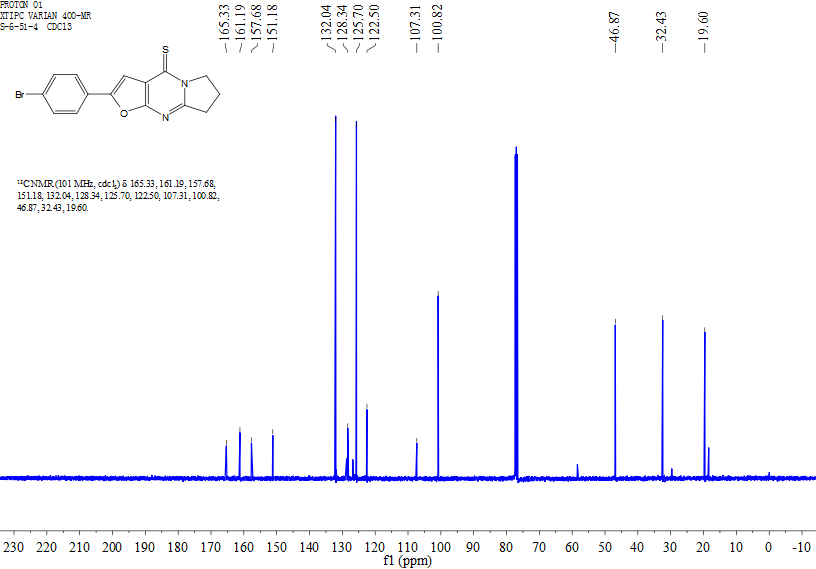
**

Figure S47. 13C NMR spectrum of **12p**

Figure S48. HRMS of **12p**


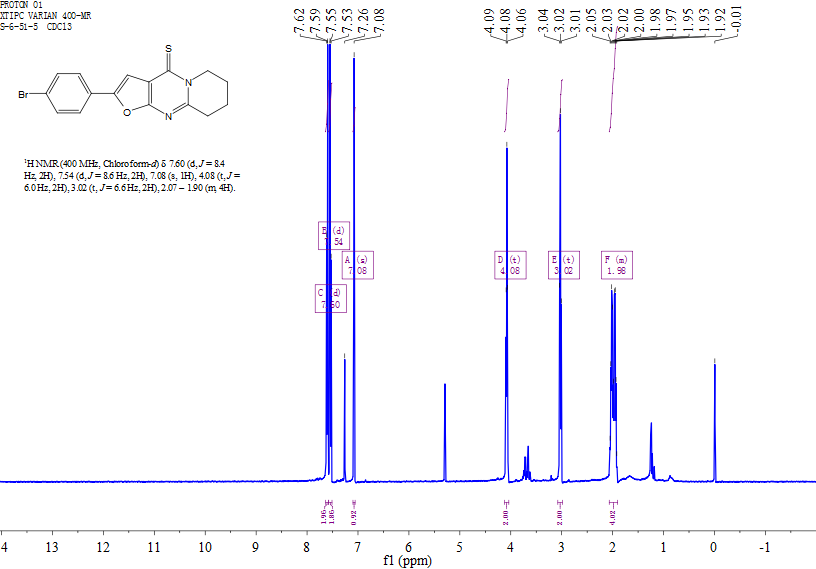


Figure S49. 1H NMR spectrum of **12q**

**
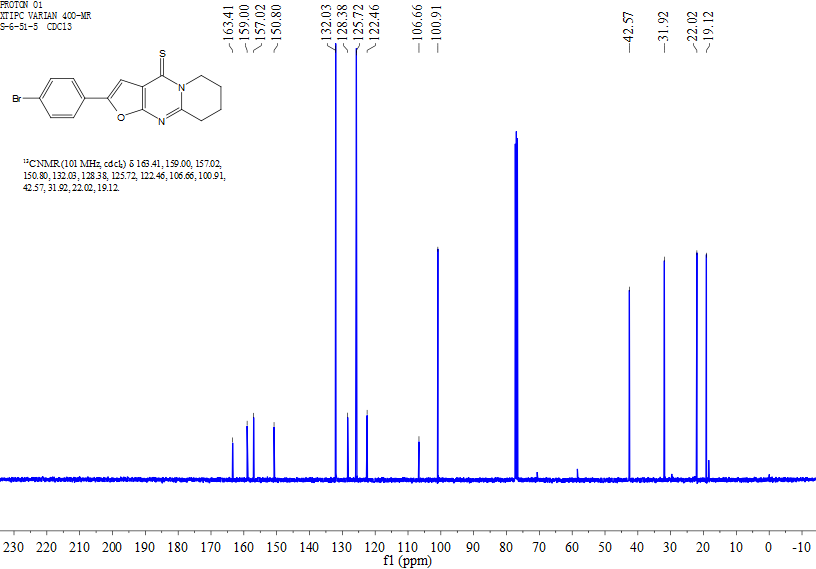
**

Figure S50. 13C NMR spectrum of **12q**

Figure S51. HRMS of **12q**


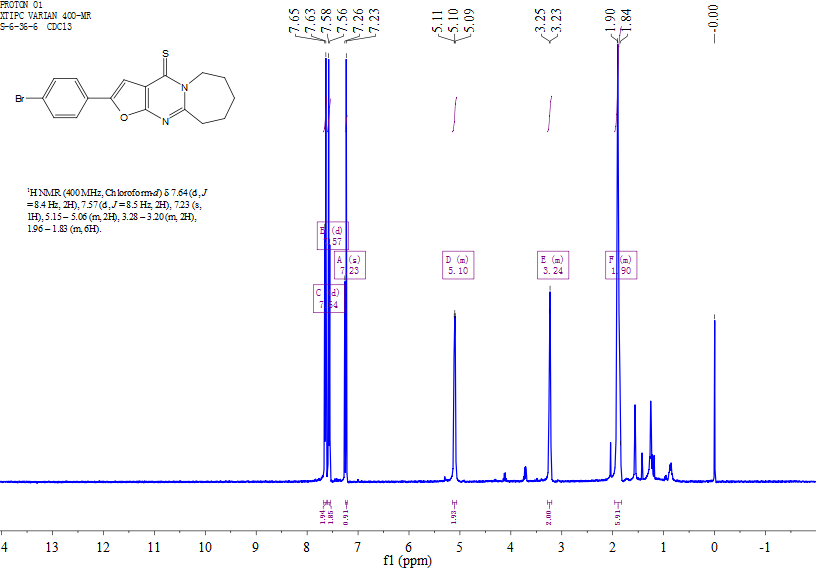


Figure S52. 1H NMR spectrum of **12r**

**
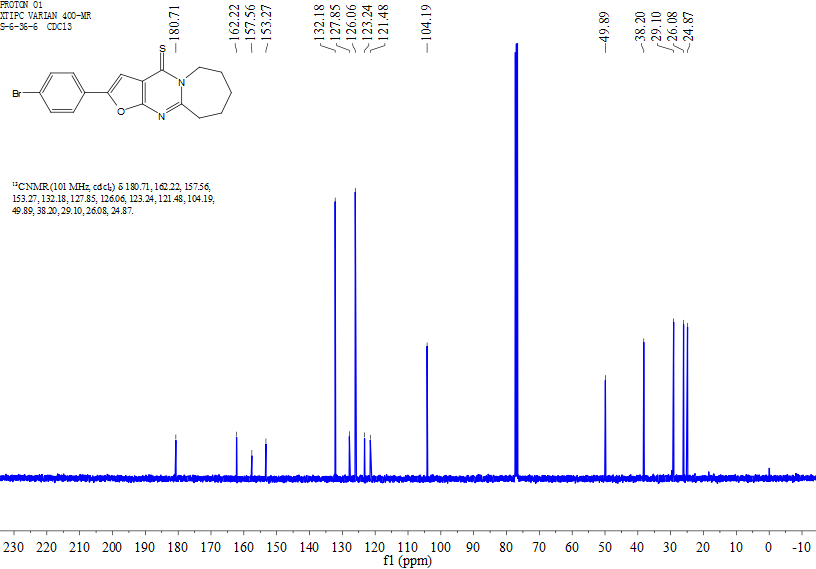
**

Figure S53. 13C NMR spectrum of **12r**

Figure S54. HRMS of **12r**


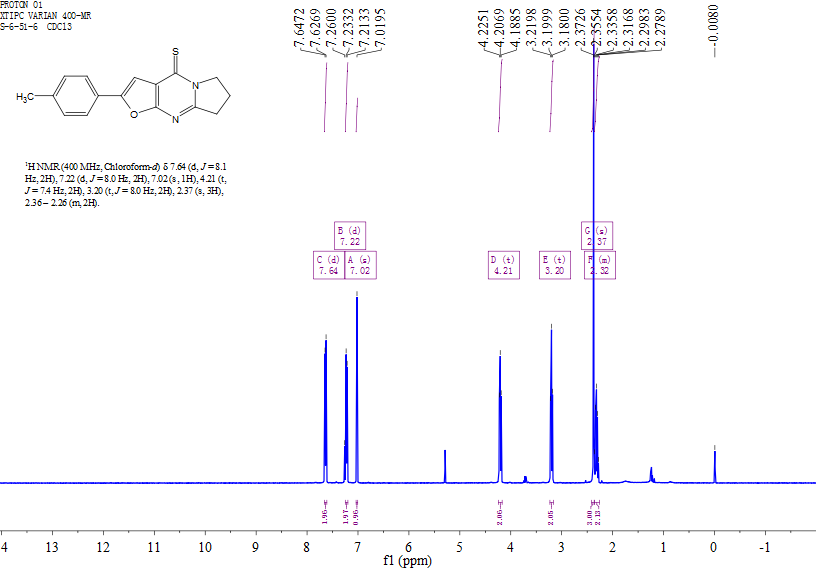


Figure S55. 1H NMR spectrum of **12s**

**
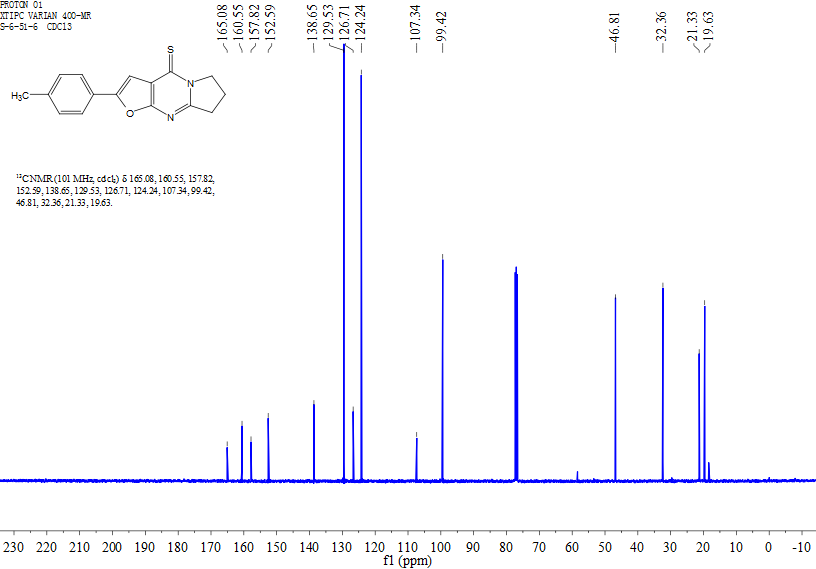
**

Figure S56. 13C NMR spectrum of **12s**

Figure S57. HRMS of **12s**


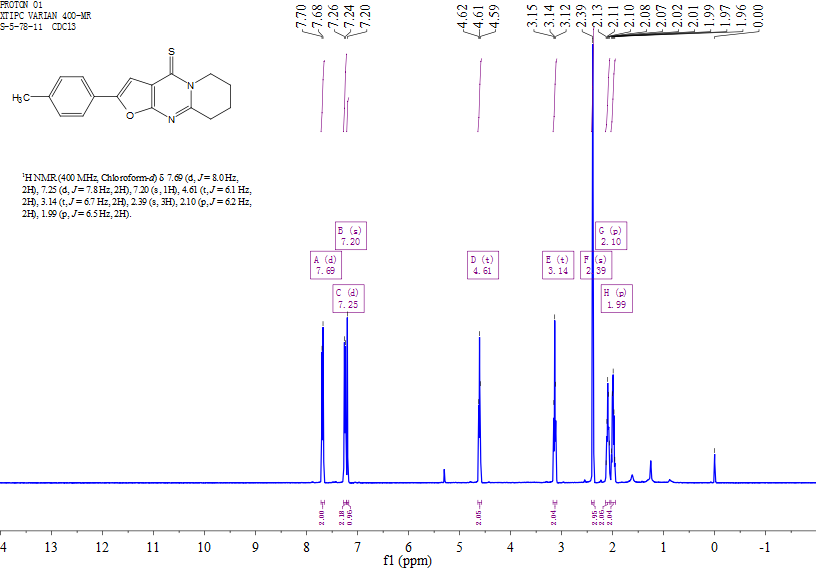


Figure S58. 1H NMR spectrum of **12t**

**
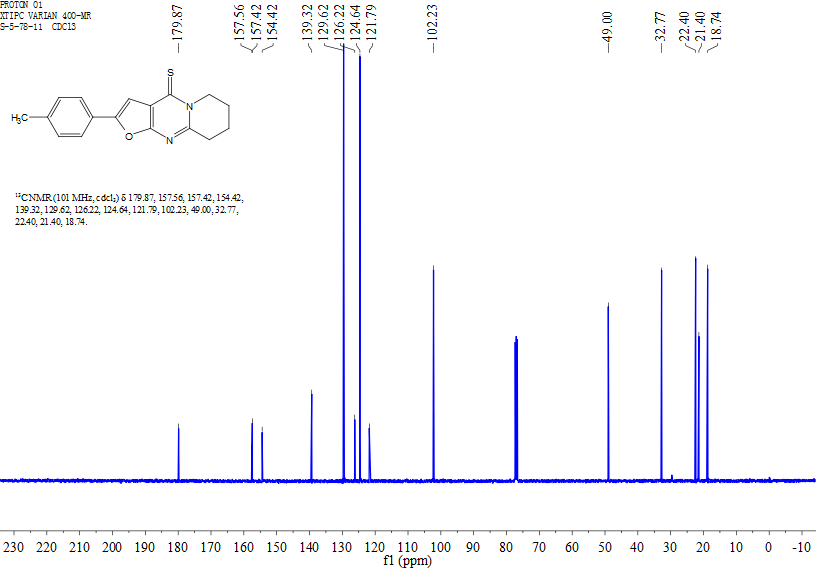
**

Figure S59. 13C NMR spectrum of **12t**

Figure S60. HRMS of **12t**


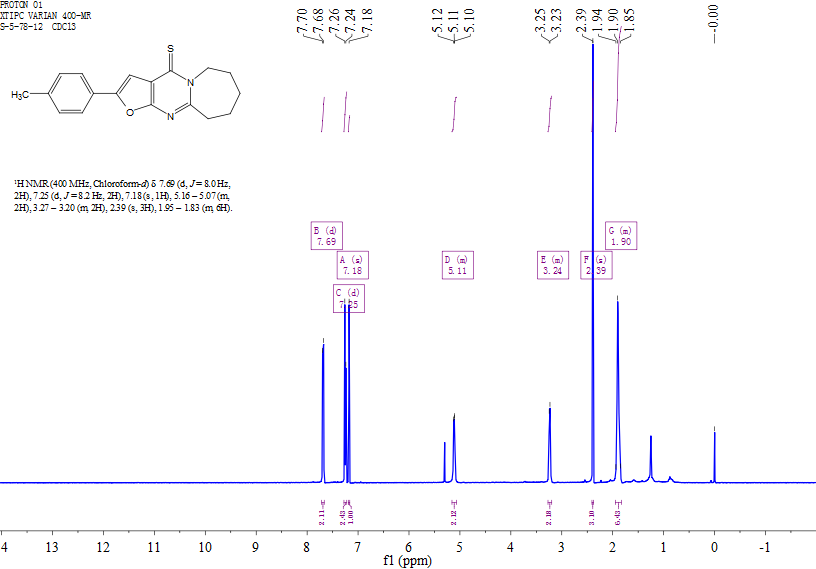


Figure S61. 1H NMR spectrum of **12u**

**
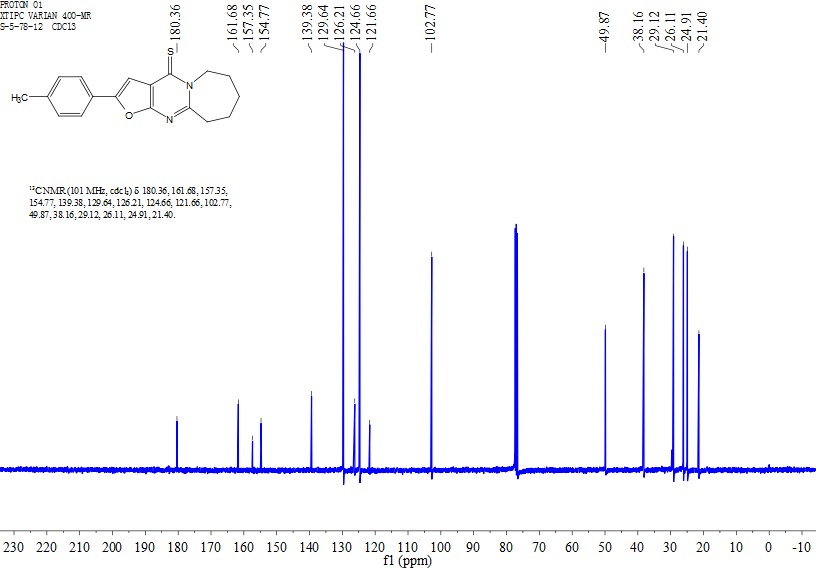
**

Figure S62. 13C NMR spectrum of **12u**

Figure S63. HRMS of **12u**


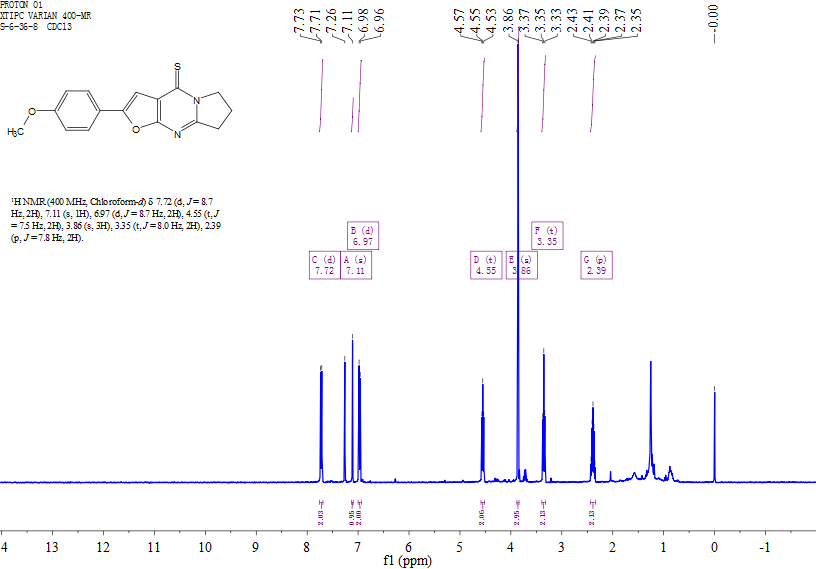


Figure S64. 1H NMR spectrum of **12v**

**
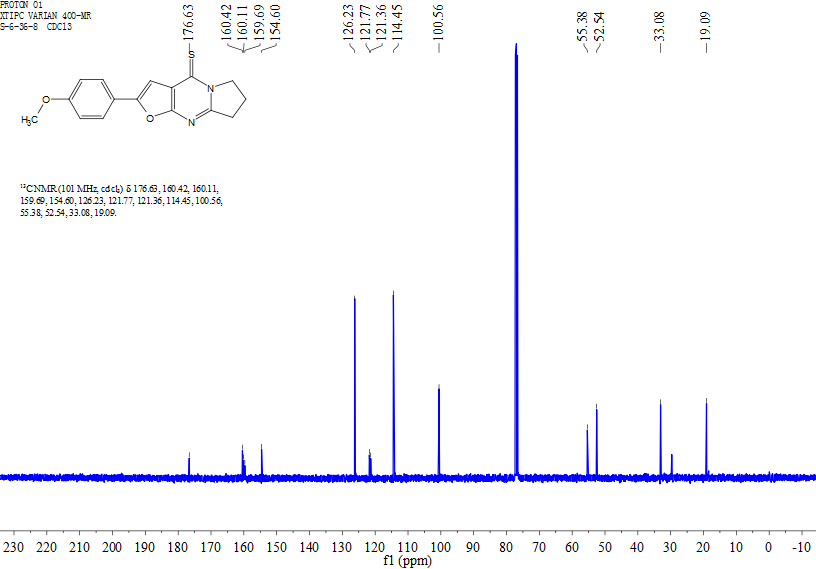
**

Figure S65. 13C NMR spectrum of **12v**

Figure S66. HRMS of **12v**

**
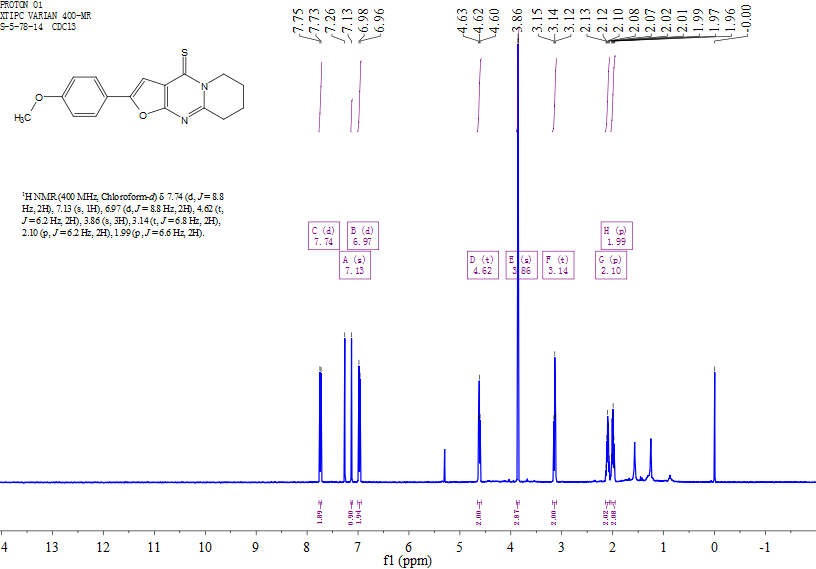
**

Figure S67. 1H NMR spectrum of **12w**

**
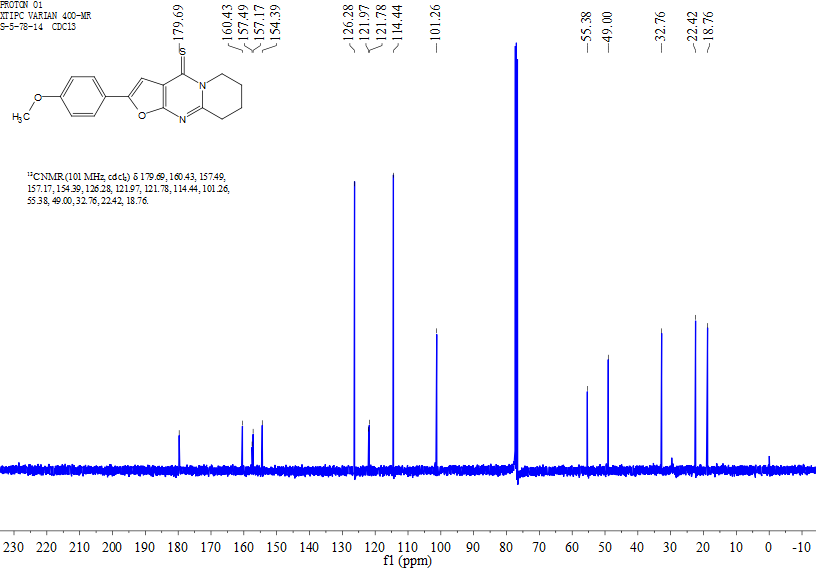
**

Figure S68. 13C NMR spectrum of **12w**

Figure S69. HRMS of **12w**


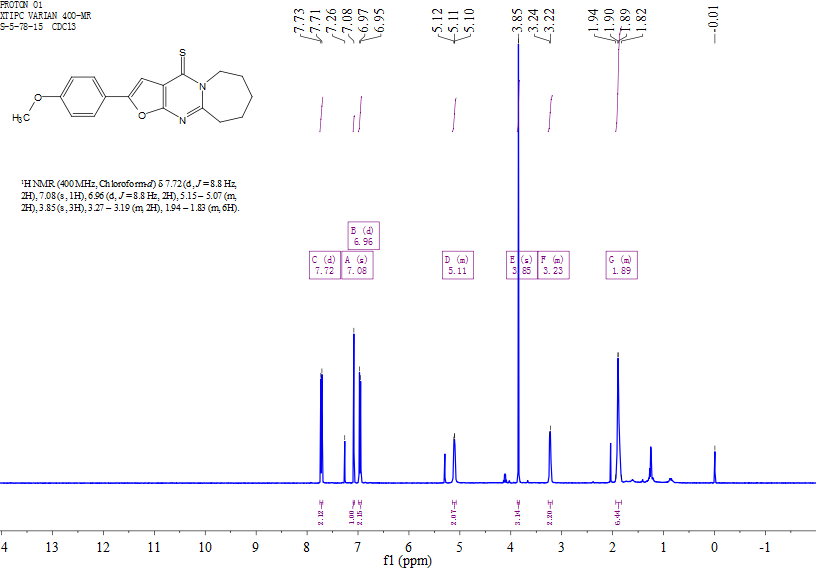


Figure S70. 1H NMR spectrum of **12x**

**
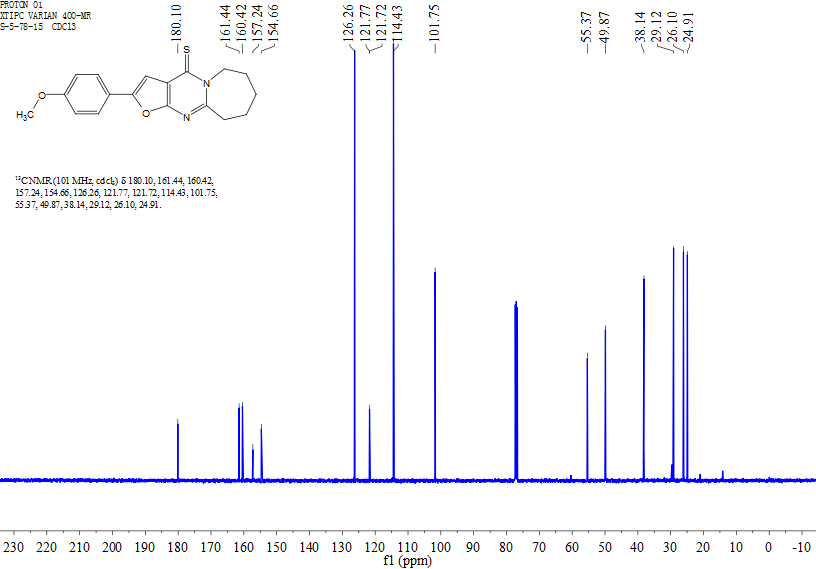
**

Figure S71. 13C NMR spectrum of **12x**

Figure S72. HRMS of **12x**


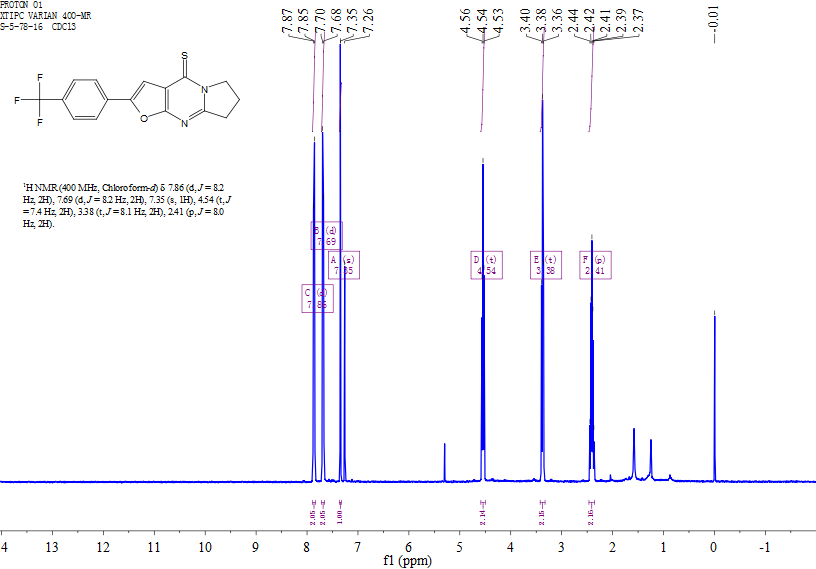


Figure S73. 1H NMR spectrum of **12y**

**
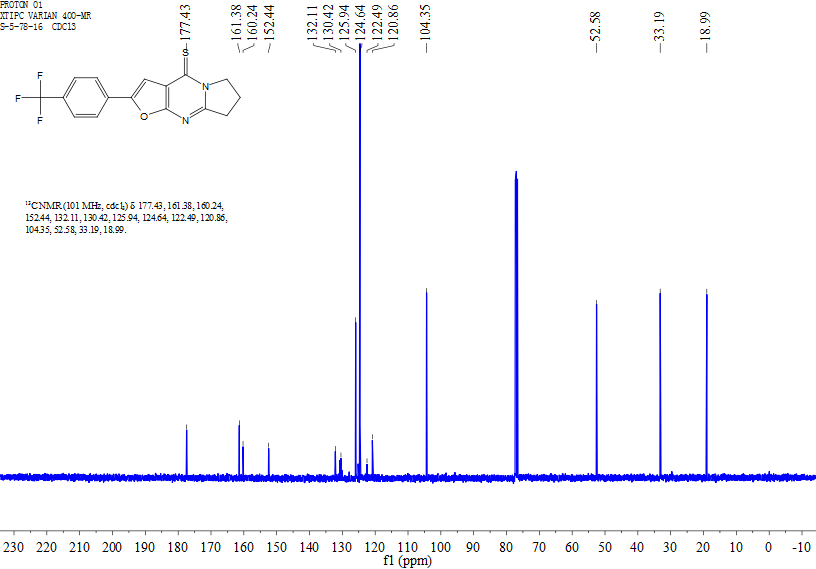
**

Figure S74. 13C NMR spectrum of **12y**

Figure S75. HRMS of **12y**


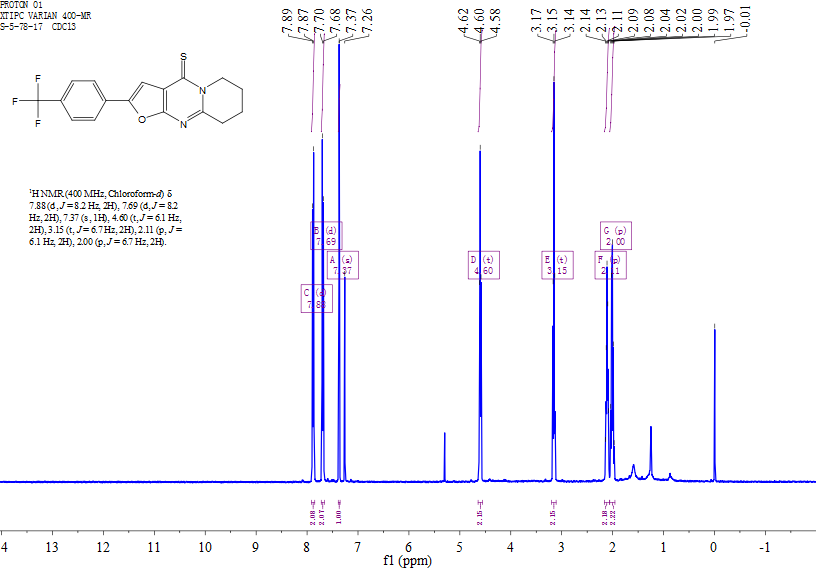


Figure S76. 1H NMR spectrum of **12z**

**
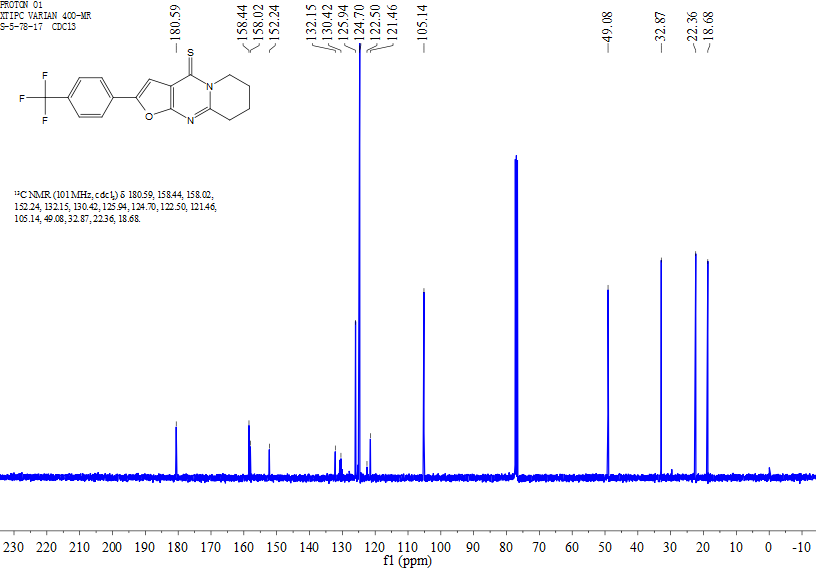
**

Figure S77. 13C NMR spectrum of **12z**

Figure S78. HRMS of **12z**


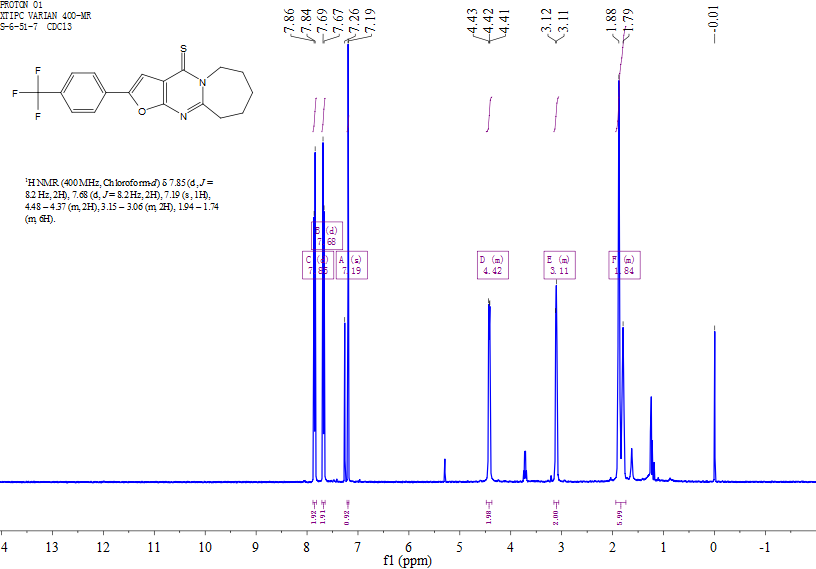


Figure S79. 1H NMR spectrum of **12aa**

**
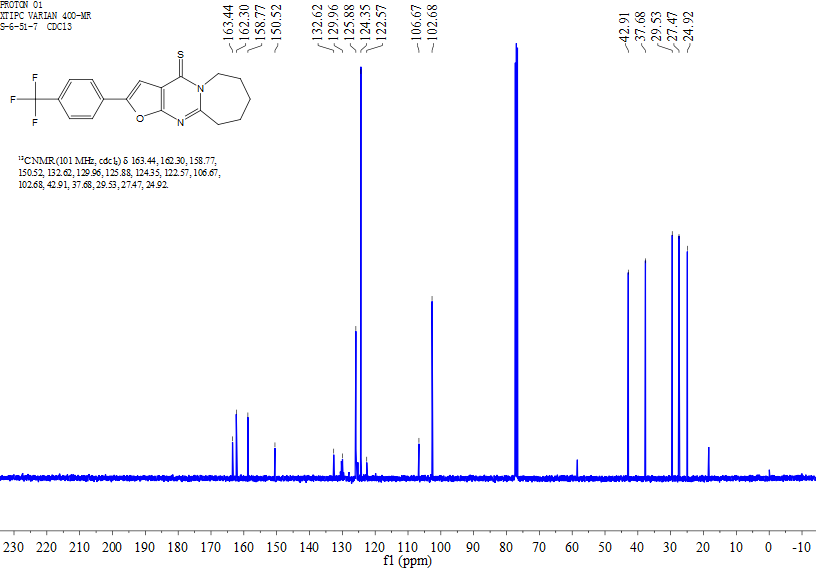
**

Figure S80. 13C NMR spectrum of **12aa**

Figure S81. HRMS of **12aa**


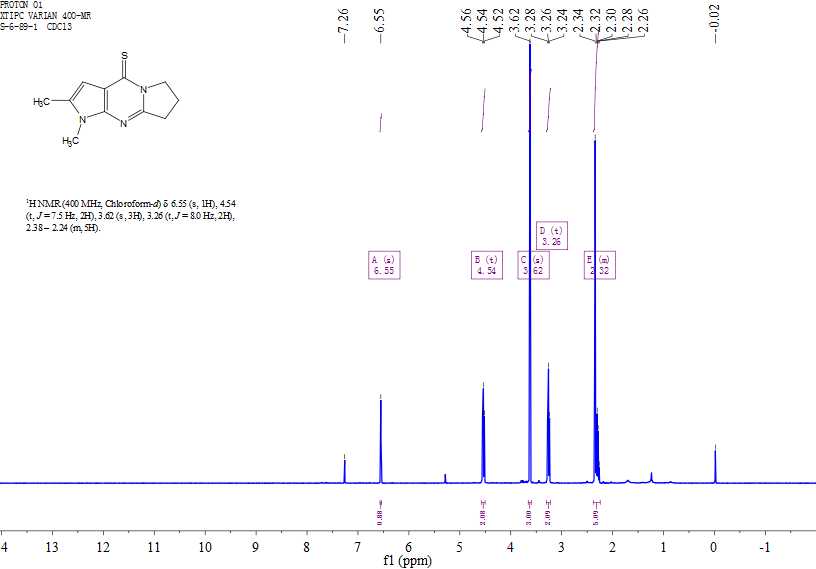


Figure S82. 1H NMR spectrum of **13a**

**
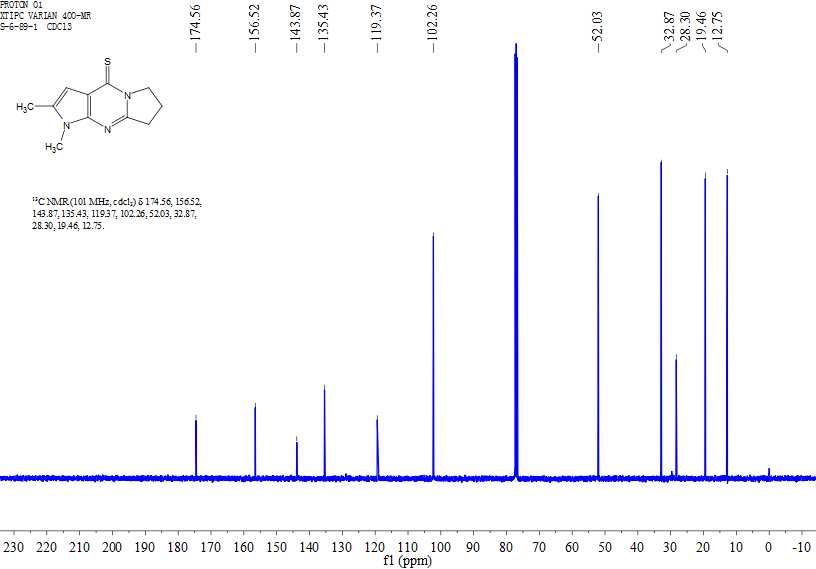
**

Figure S83. 13C NMR spectrum of **13a**

Figure S84. HRMS of **13a**


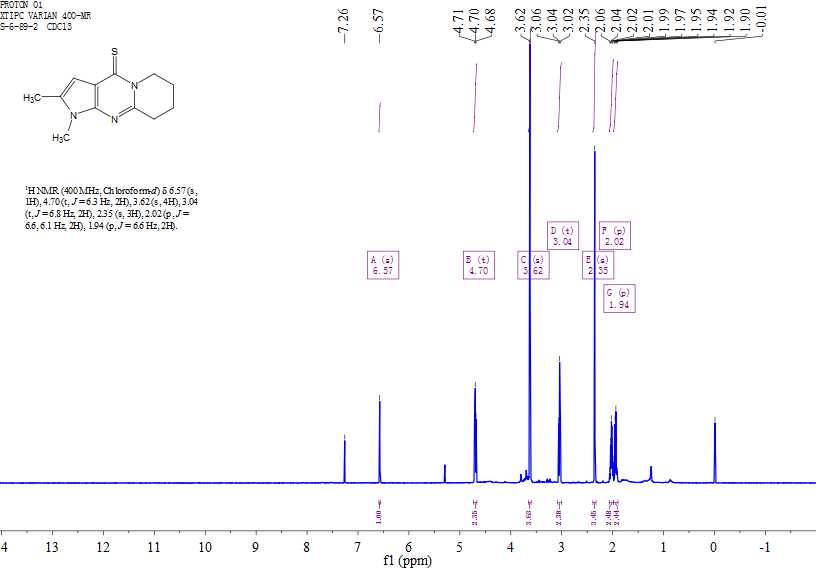


Figure S85. 1H NMR spectrum of **13b**

**
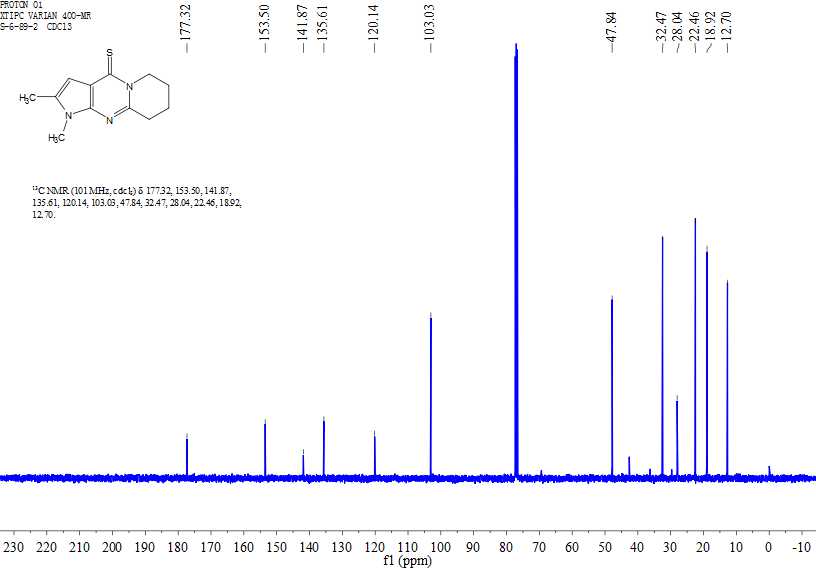
**

Figure S86. 13C NMR spectrum of **13b**

Figure S87. HRMS of **13b**


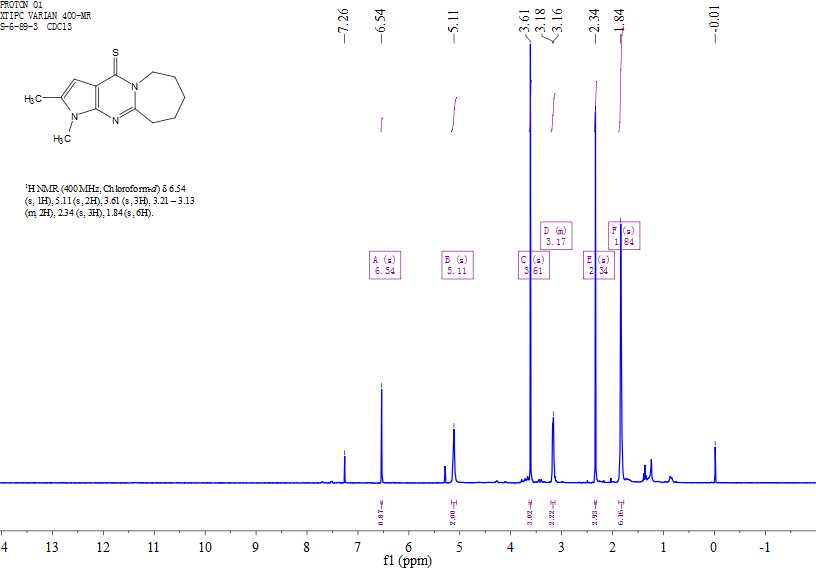


Figure S88. 1H NMR spectrum of **13c**

**
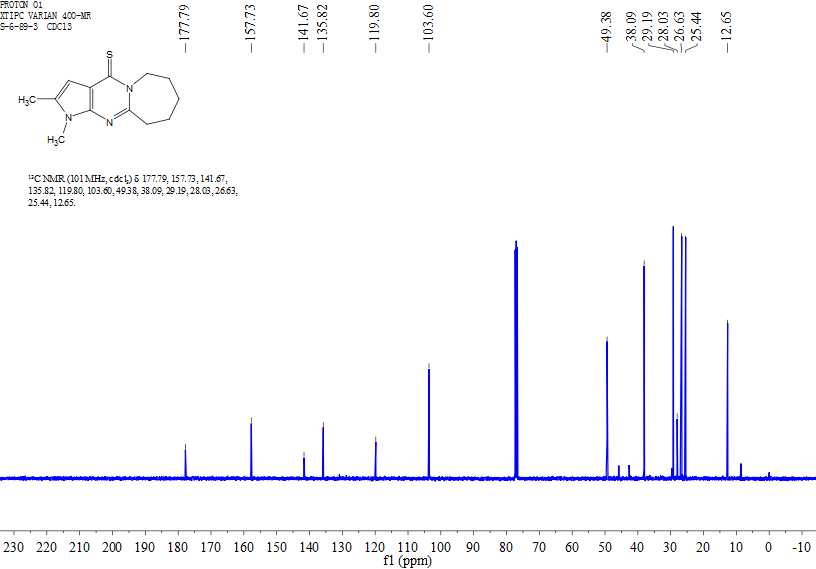
**

Figure S89. 13C NMR spectrum of **13c**

Figure S90. HRMS of **13c**


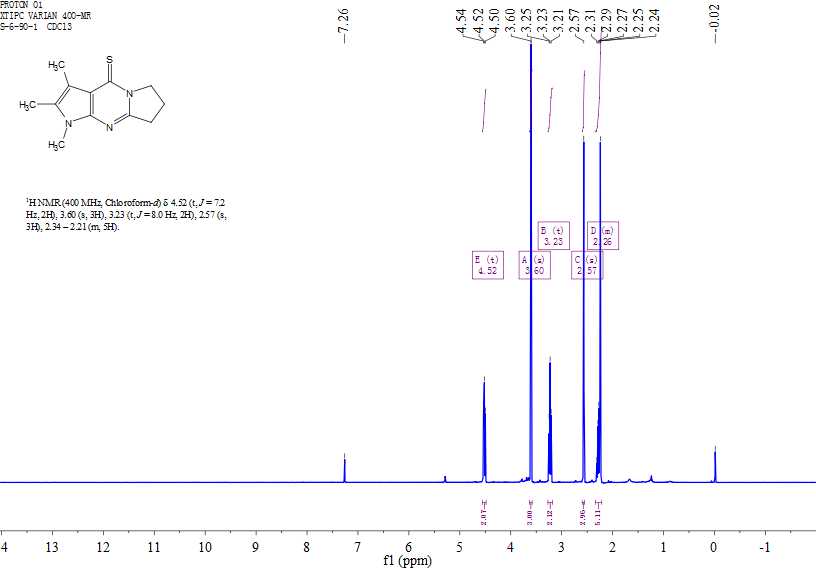


Figure S91. 1H NMR spectrum of **13d**

**
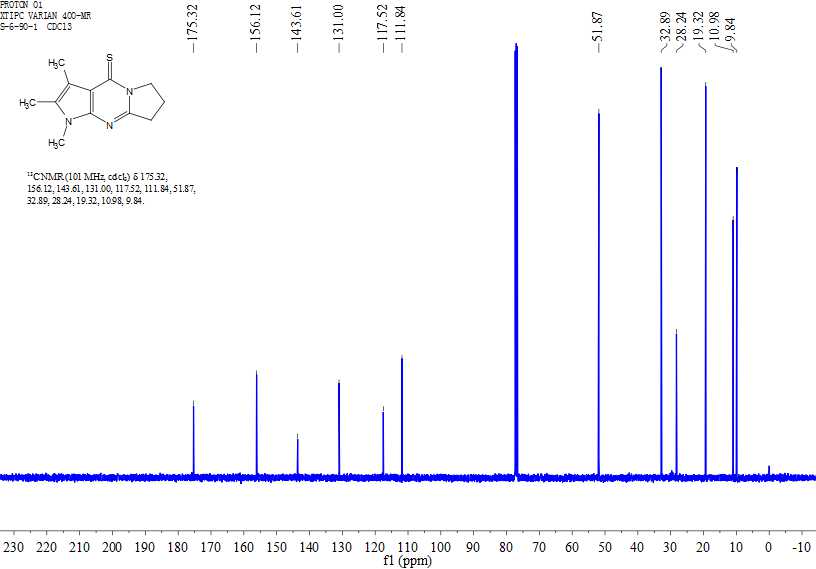
**

Figure S92. 13C NMR spectrum of **13d**

Figure S93. HRMS of **13d**


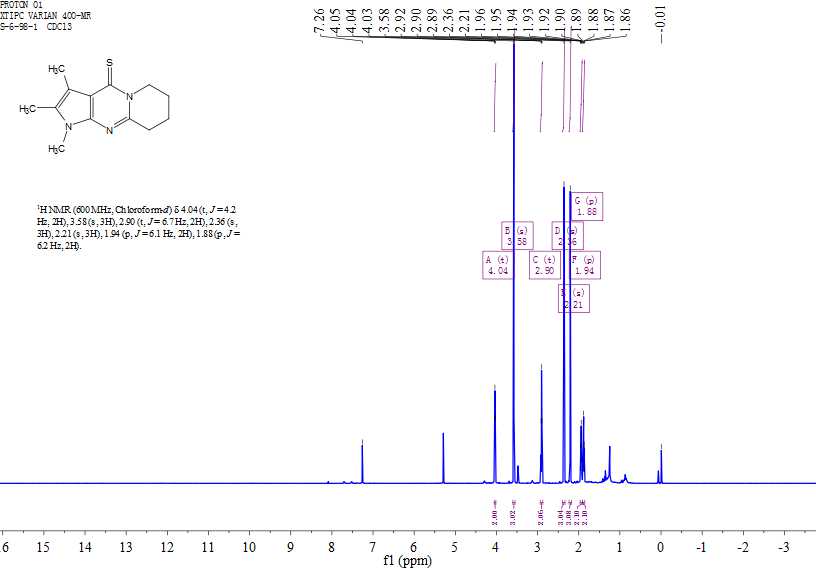


Figure S94. 1H NMR spectrum of **13e**

**
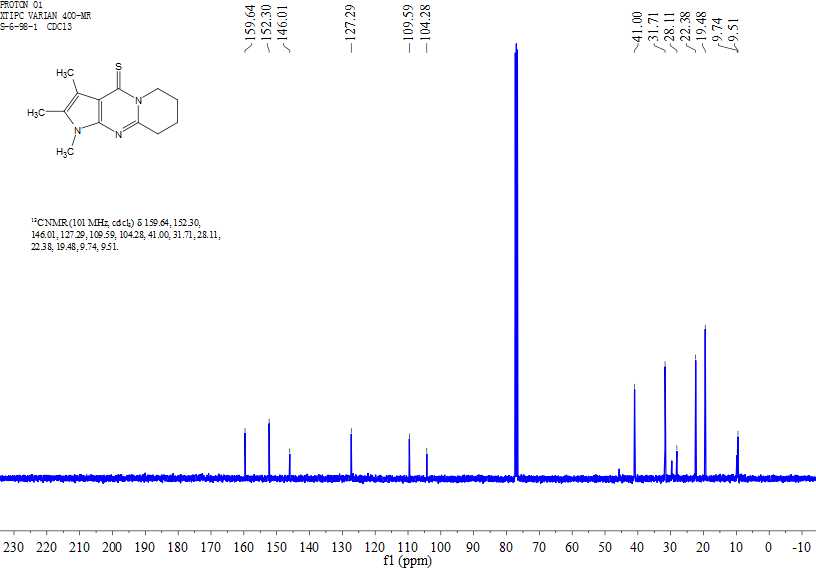
**

Figure S95. 13C NMR spectrum of **13e**

Figure S96. HRMS of **13e**


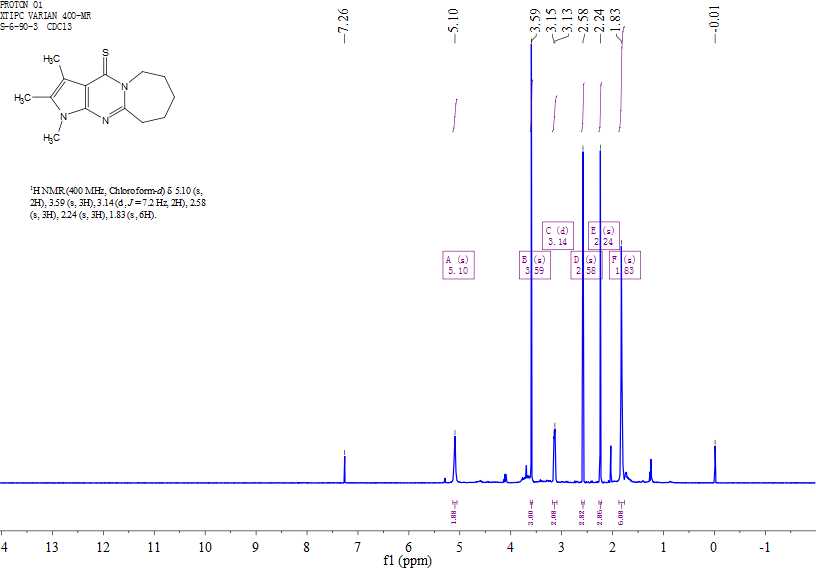


Figure S97. 1H NMR spectrum of **13f**

**
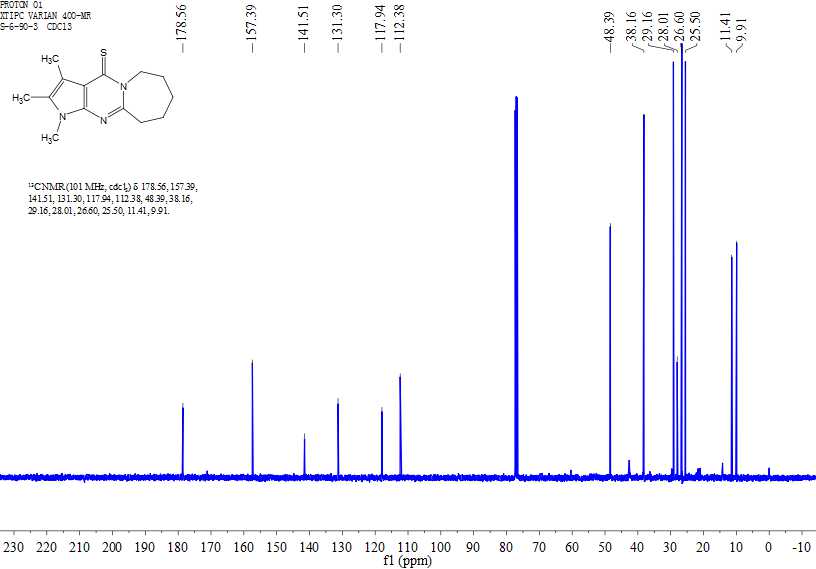
**

Figure S98. 13C NMR spectrum of **13f**

Figure S99. HRMS of **13f**


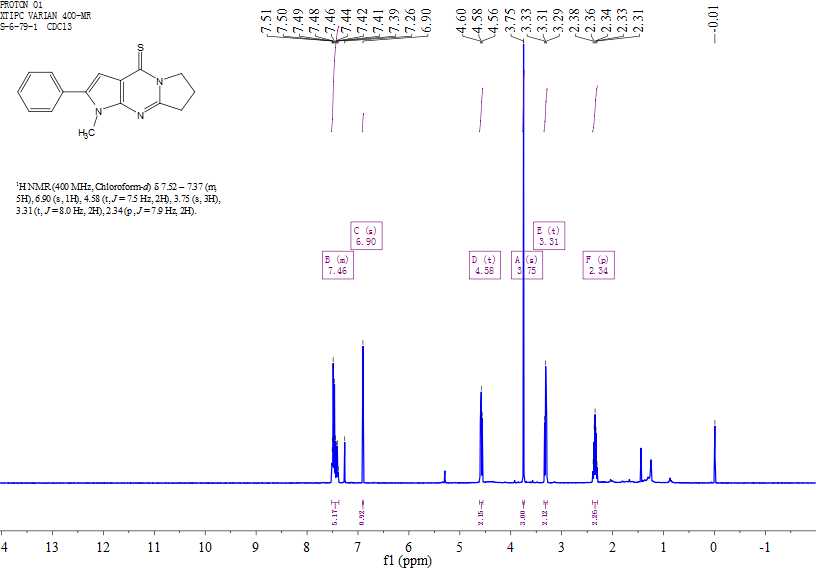


Figure S100. 1H NMR spectrum of **13g**

**
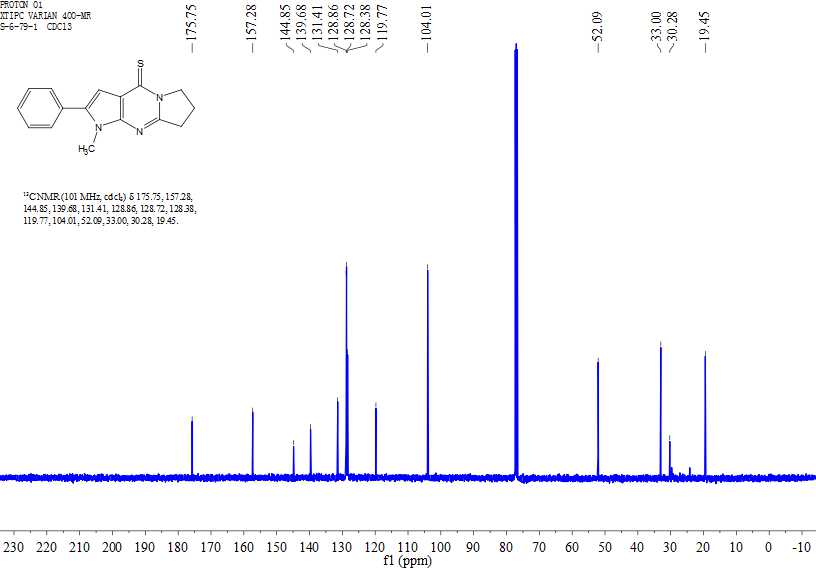
**

Figure S101. 13C NMR spectrum of **13g**

Figure S102. HRMS of **13g**


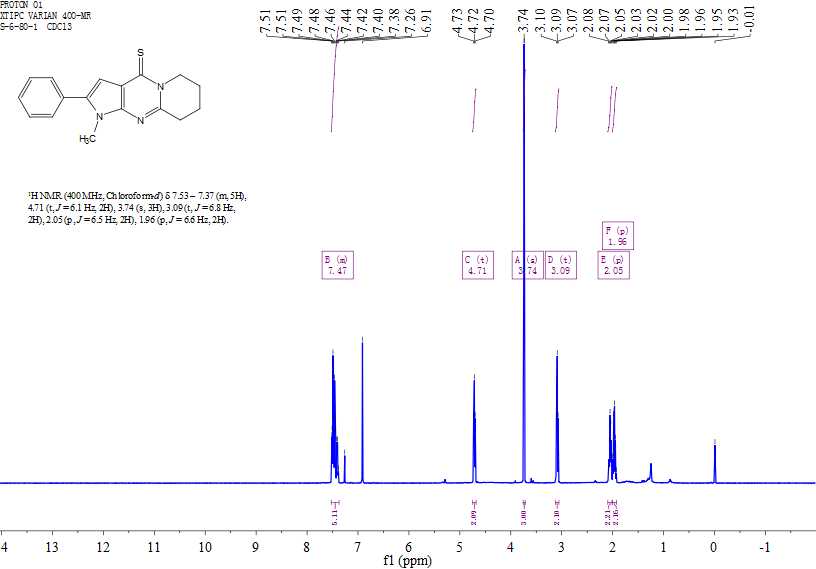


Figure S103. 1H NMR spectrum of **13h**

**
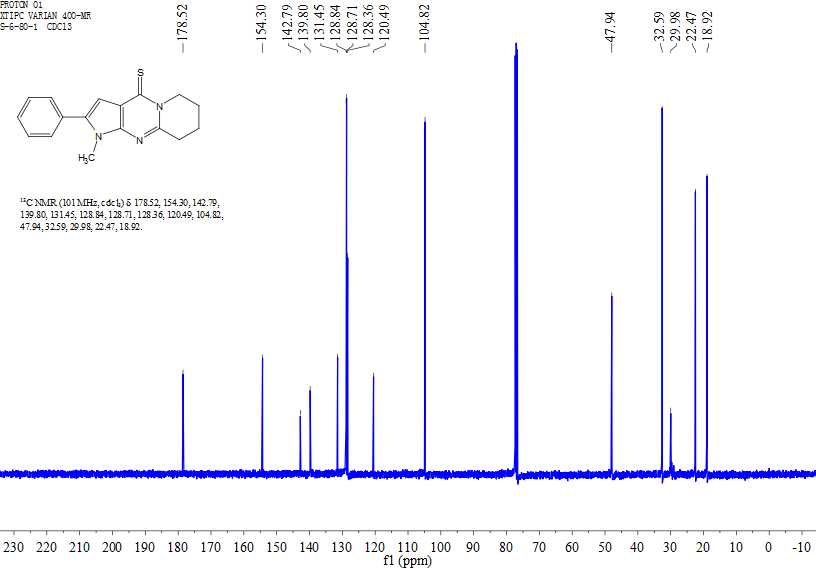
**

Figure S104. 13C NMR spectrum of **13h**

Figure S105. HRMS of **13h**


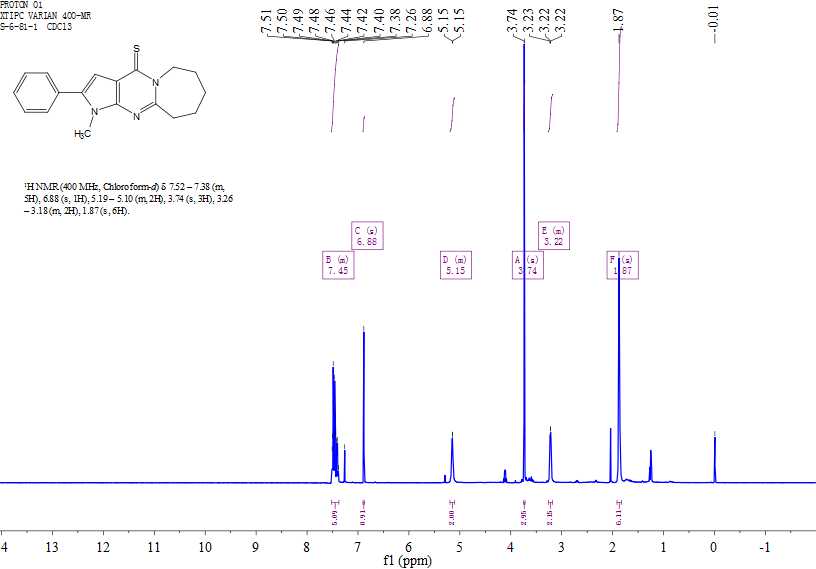


Figure S106. 1H NMR spectrum of **13i**

**
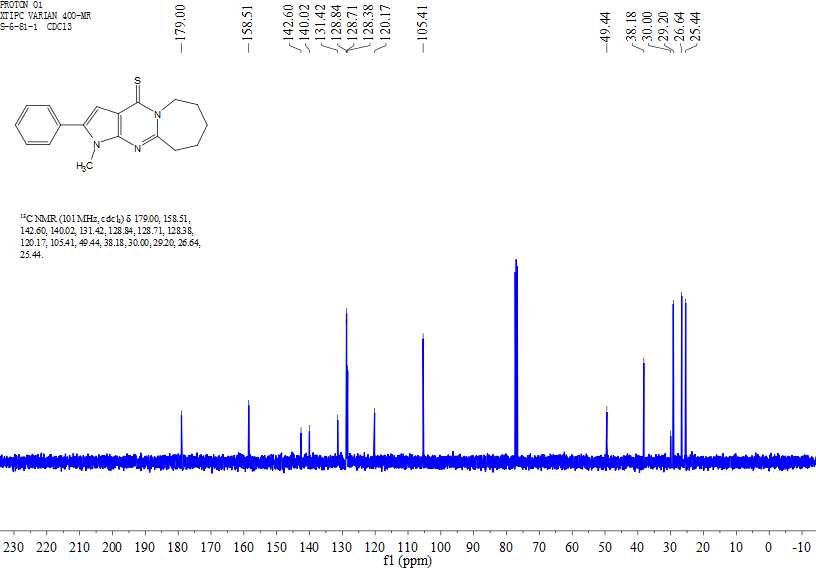
**

Figure S107. 13C NMR spectrum of **13i**

Figure S108. HRMS of **13i**


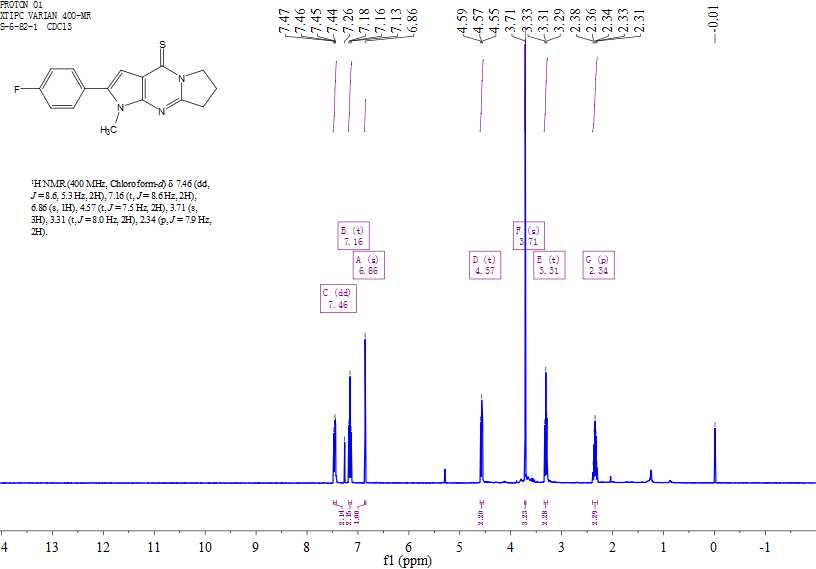


Figure S109. 1H NMR spectrum of **13j**

**
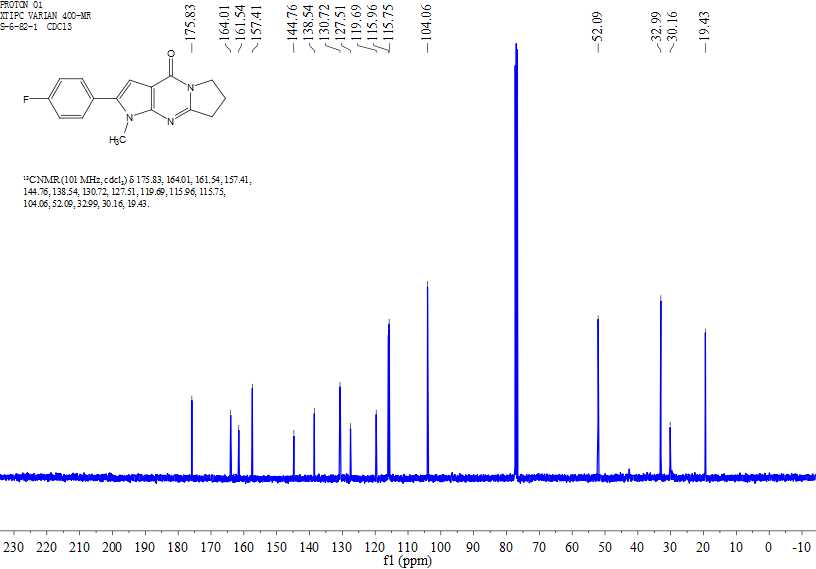
**

Figure S110. 13C NMR spectrum of **13j**

Figure S111. HRMS of **13j**


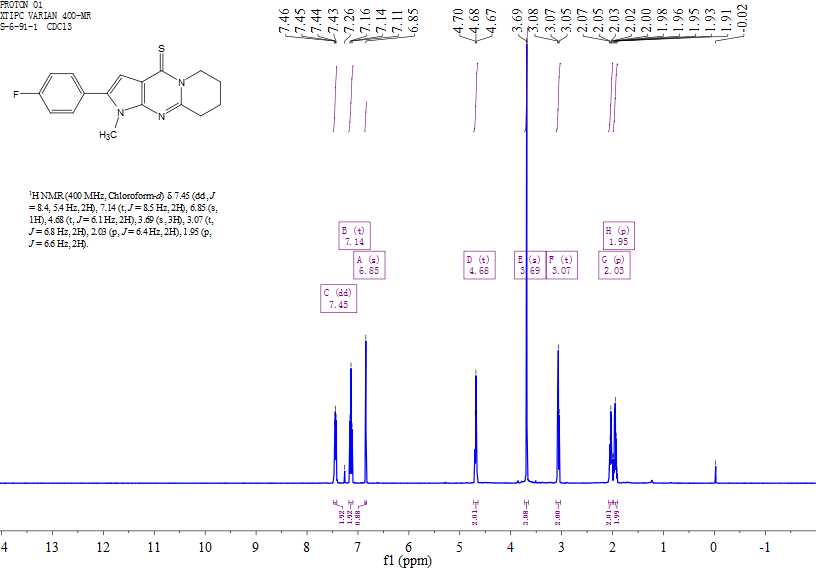


Figure S112. 1H NMR spectrum of **13k**

**
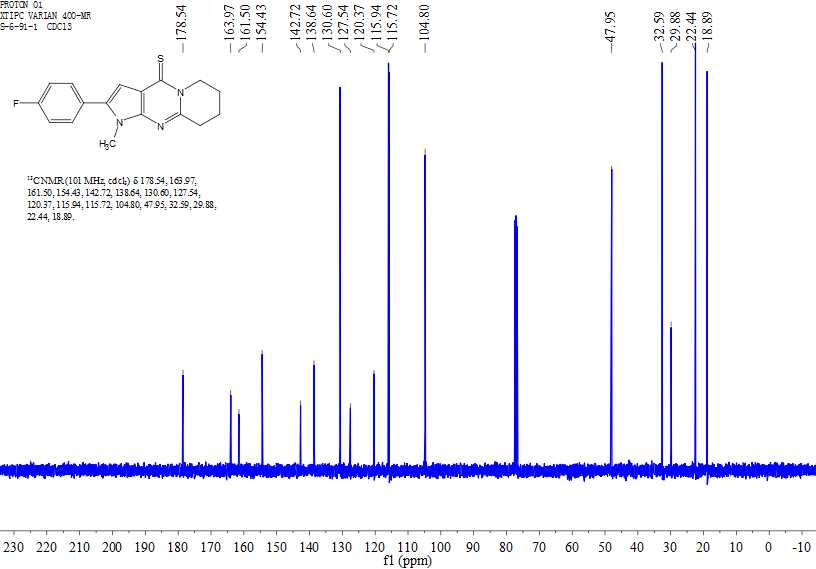
**

Figure S113. 13C NMR spectrum of **13k**

Figure S114. HRMS of **13k**


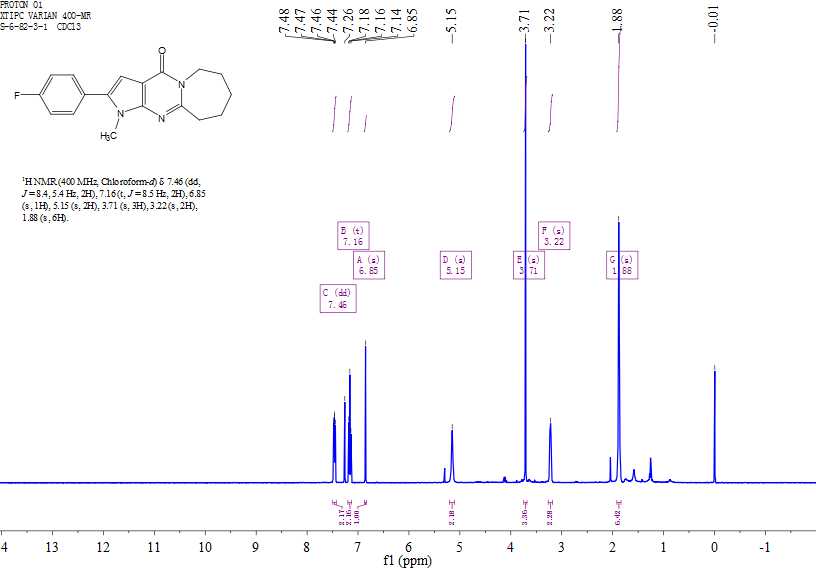


Figure S115. 1H NMR spectrum of **13l**

**
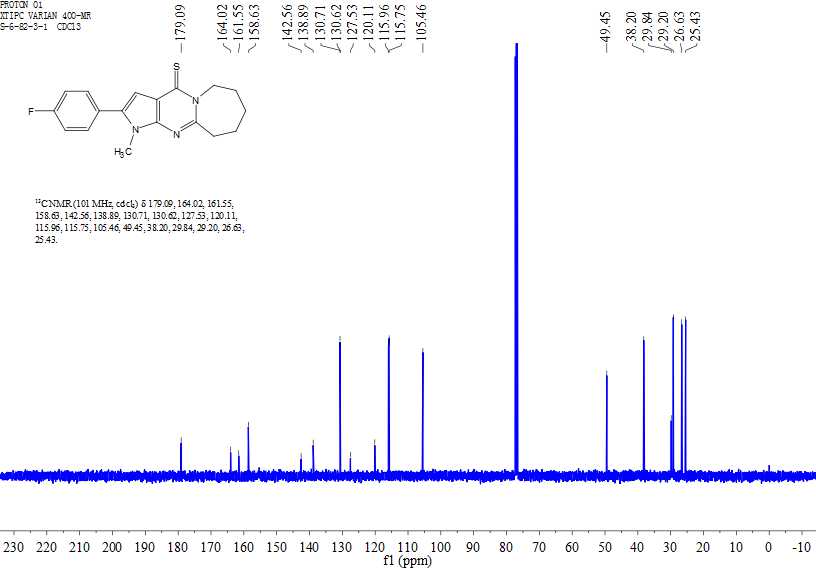
**

Figure S116. 13C NMR spectrum of **13l**

Figure S117. HRMS of **13l**


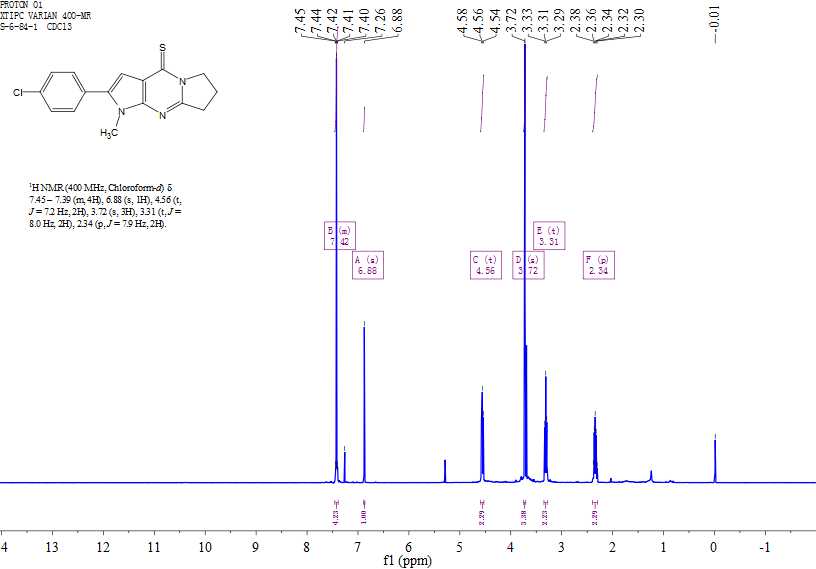


Figure S118. 1H NMR spectrum of **13m**

**
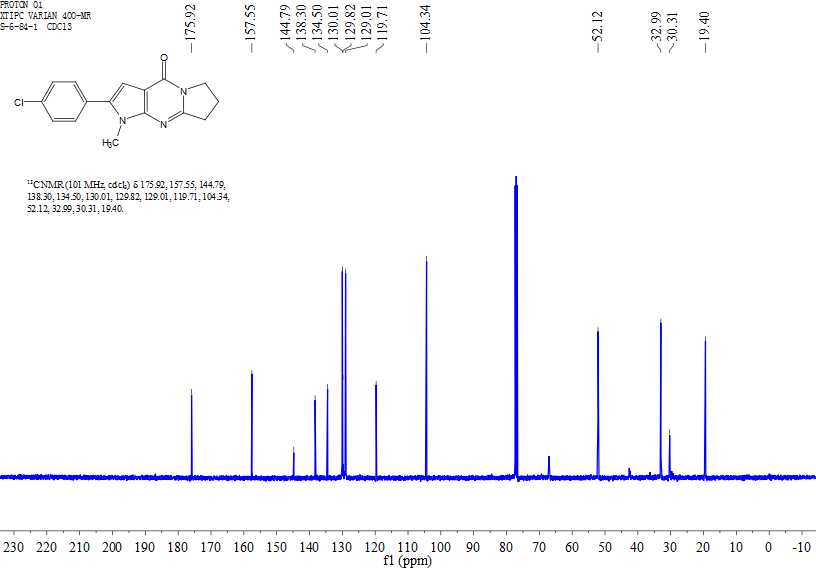
**

Figure S119. 13C NMR spectrum of **13m**

Figure S120. HRMS of **13m**


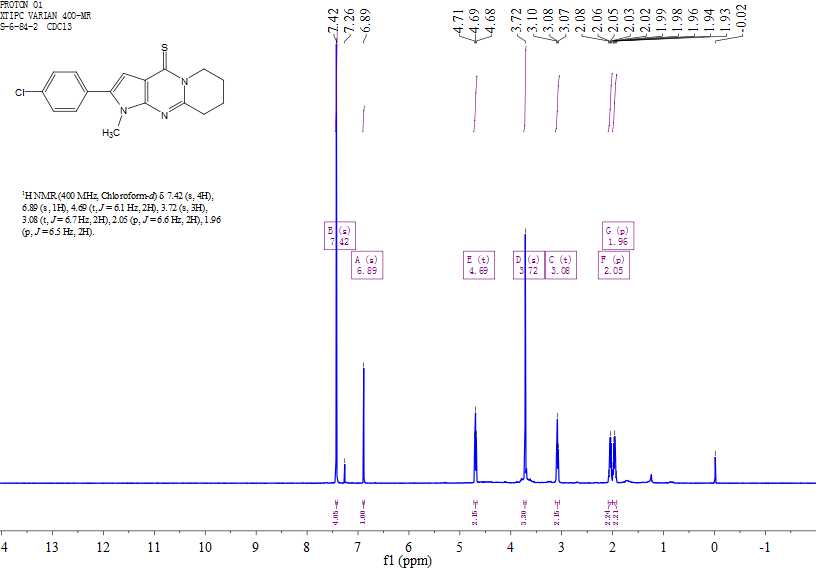


Figure S121. 1H NMR spectrum of **13n**

**
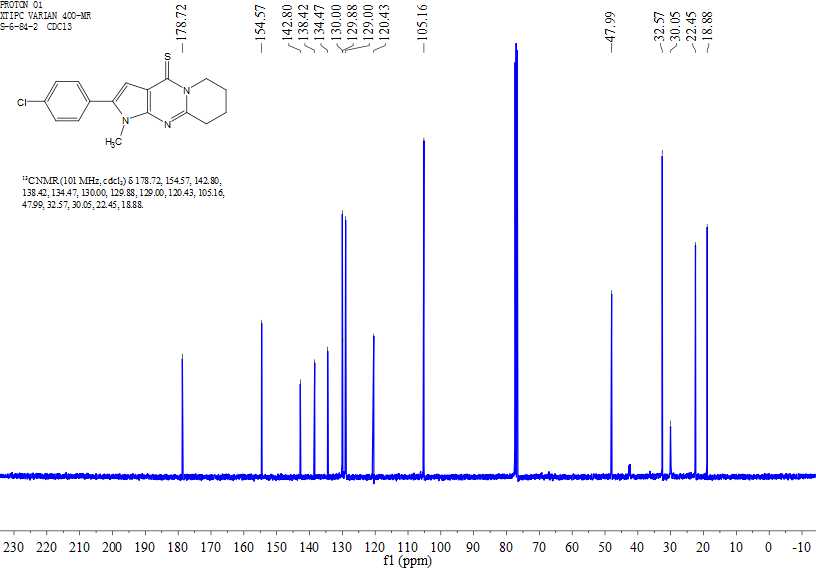
**

Figure S122. 13C NMR spectrum of **13n**

Figure S123. HRMS of **13n**


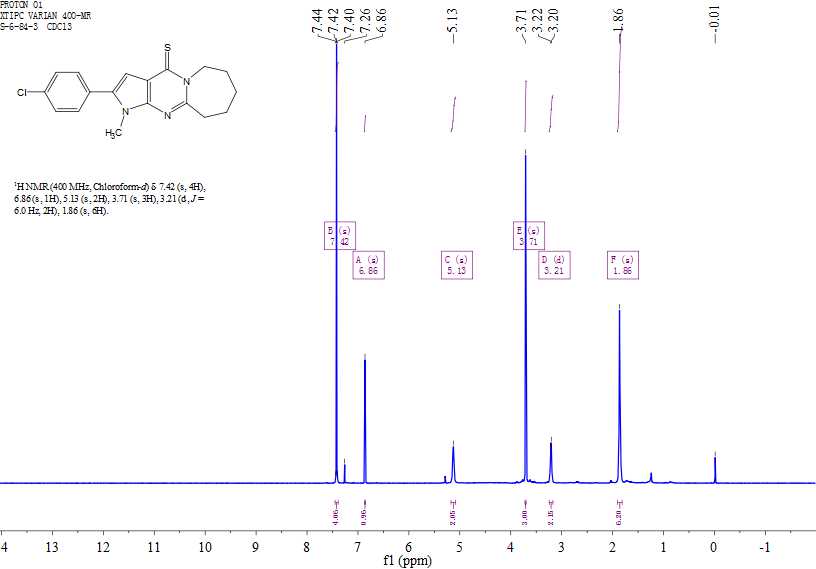


Figure S124. 1H NMR spectrum of **13o**

**
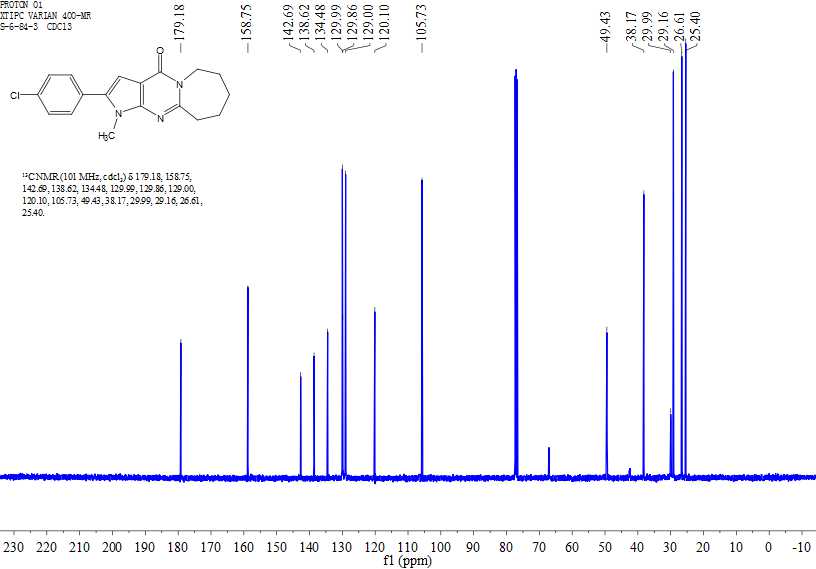
**

Figure S125. 13C NMR spectrum of **13o**

Figure S126. HRMS of **13o**


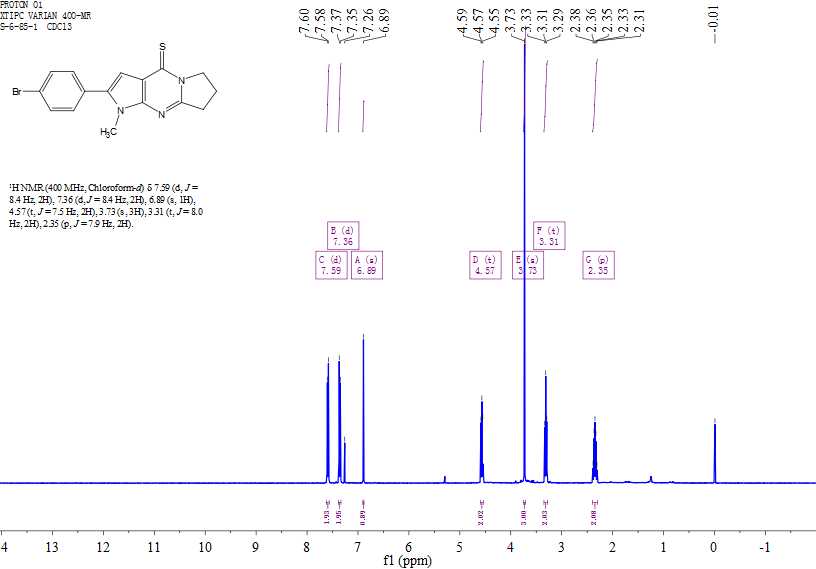


Figure S127. 1H NMR spectrum of **13p**

**
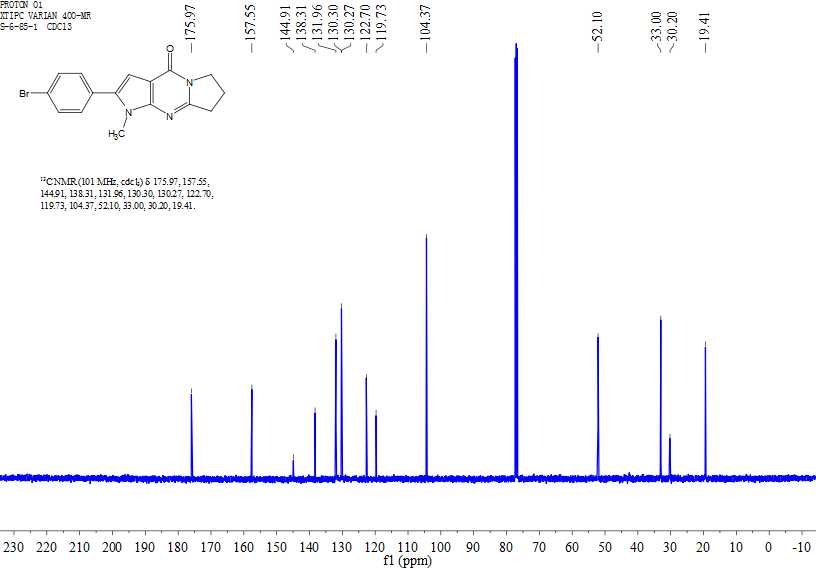
**

Figure S128. 13C NMR spectrum of **13p**

Figure S129. HRMS of **13p**


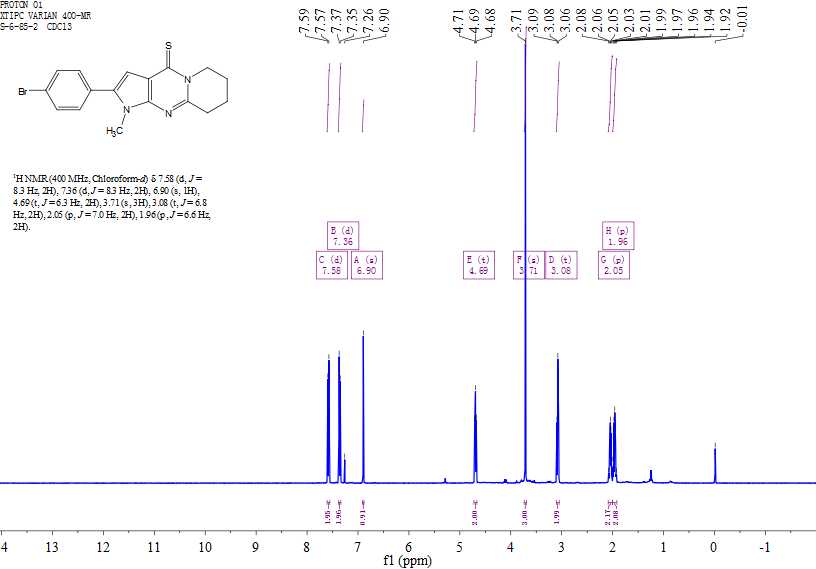


Figure S130. 1H NMR spectrum of **13q**

**
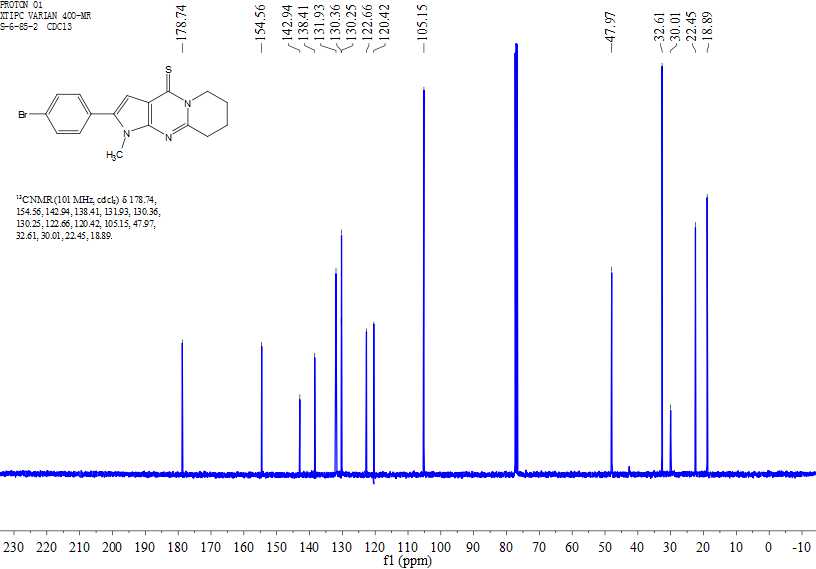
**

Figure S131. 13C NMR spectrum of **13q**

Figure S132. HRMS of **13q**


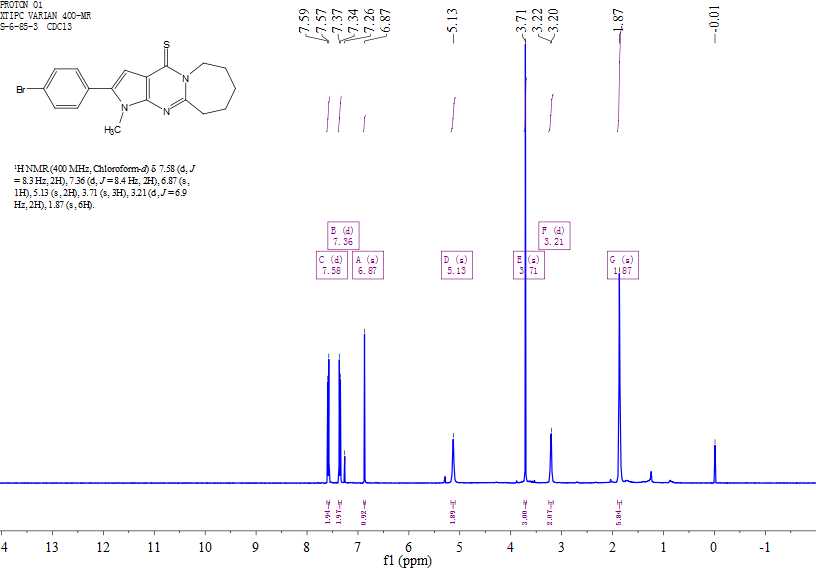


Figure S133. 1H NMR spectrum of **13r**

**
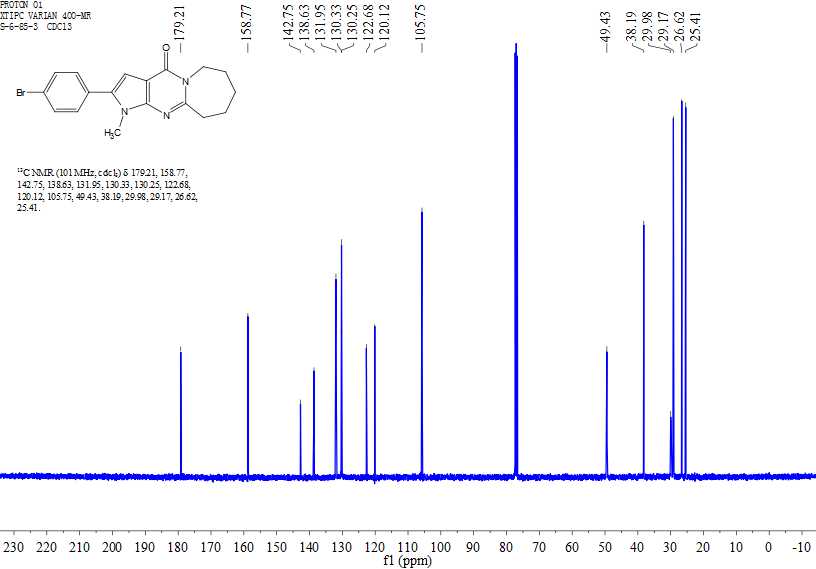
**

Figure S134. 13C NMR spectrum of **13r**

Figure S135. HRMS of **13r**


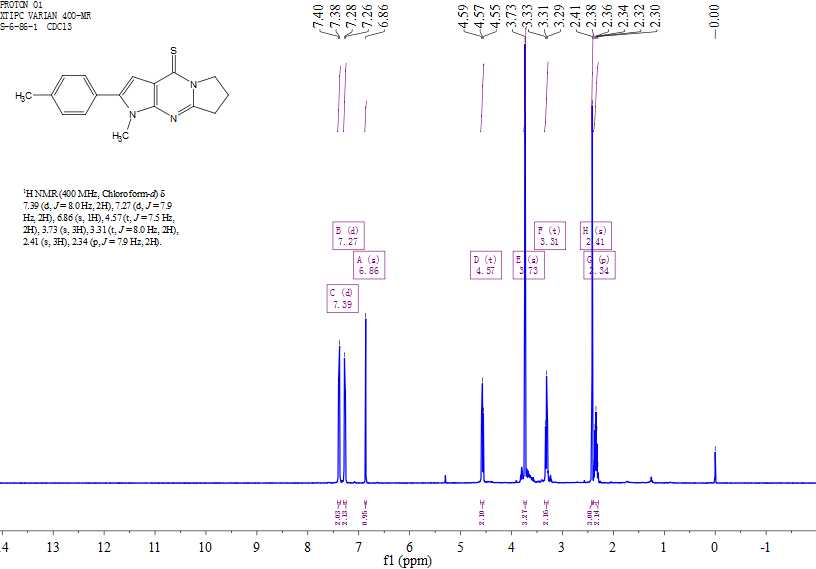


Figure S136. 1H NMR spectrum of **13s**

**
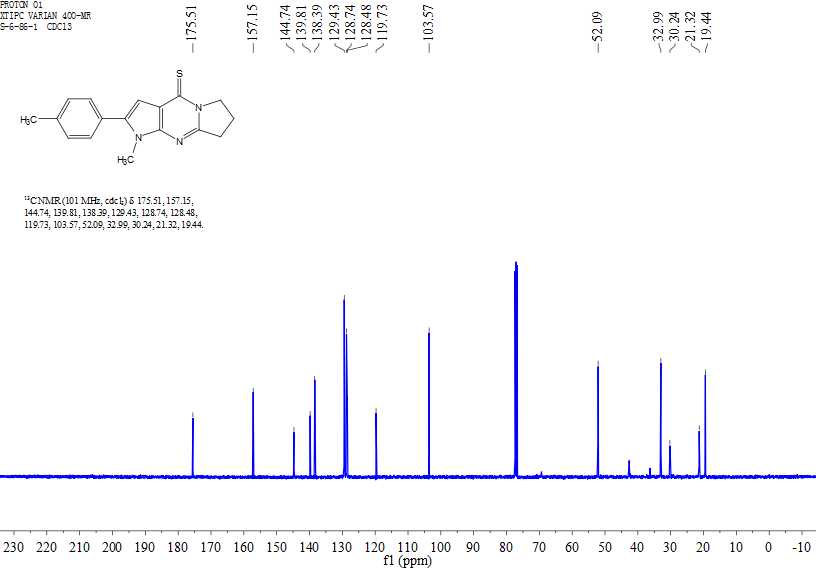
**

Figure S137. 13C NMR spectrum of **13s**

Figure S138. HRMS of **13s**


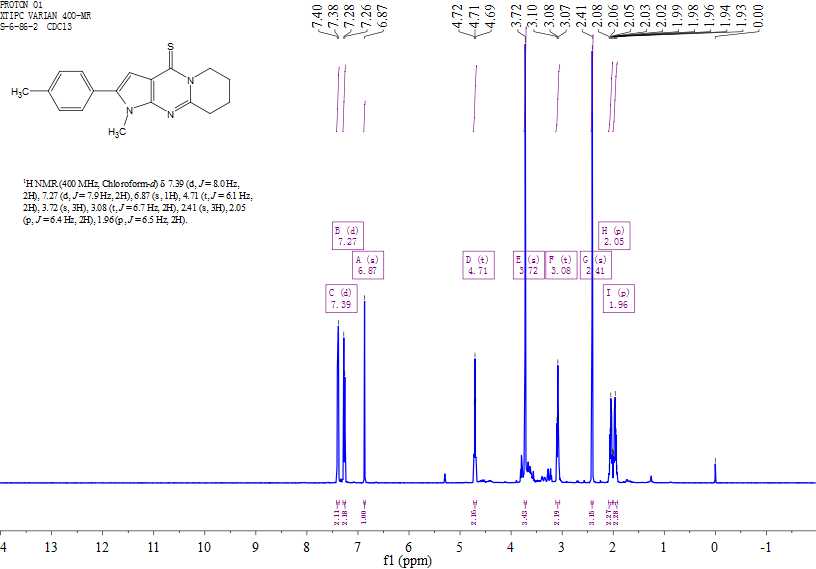


Figure S139. 1H NMR spectrum of **13t**

**
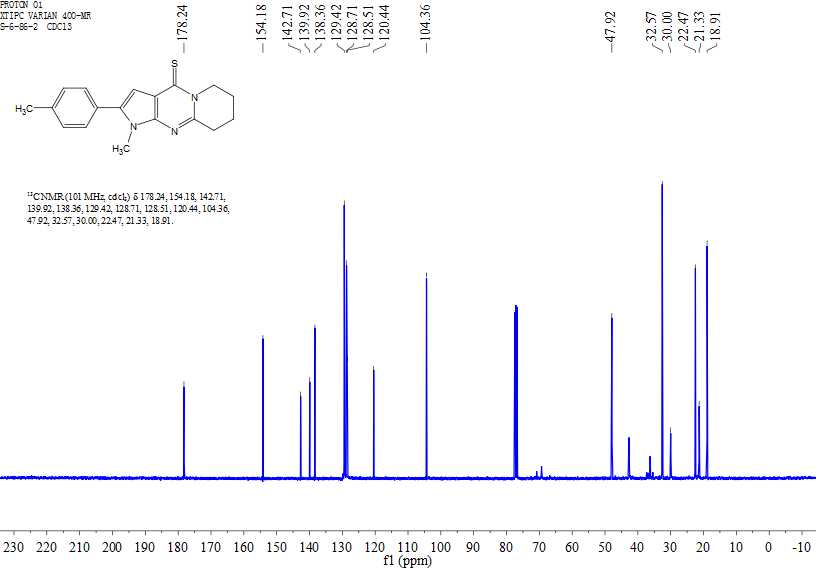
**

Figure S140. 13C NMR spectrum of **13t**

Figure S141. HRMS of **13t**


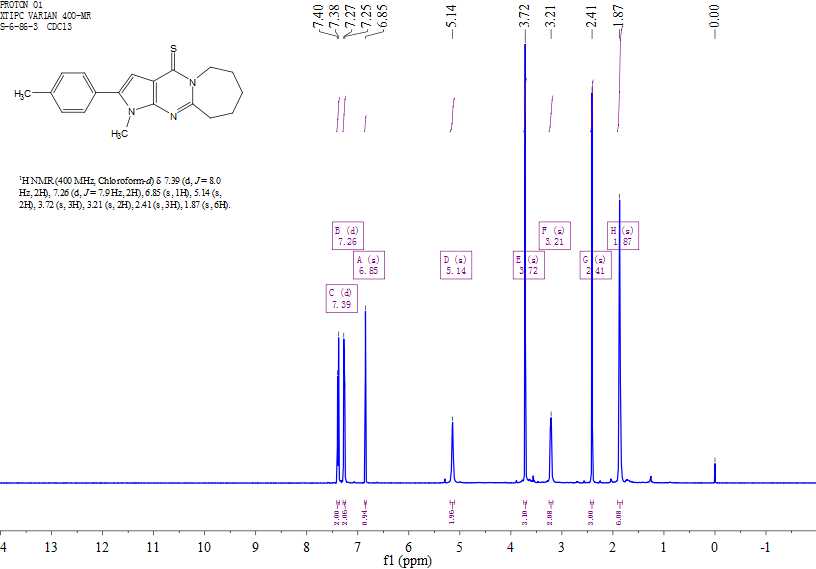


Figure S142. 1H NMR spectrum of **13u**

**
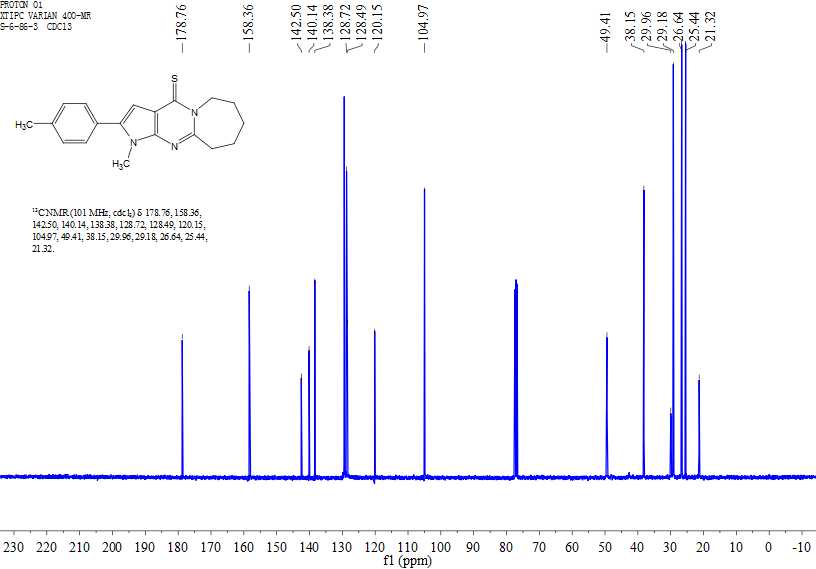
**

Figure S143. 13C NMR spectrum of **13u**

Figure S144. HRMS of **13u**


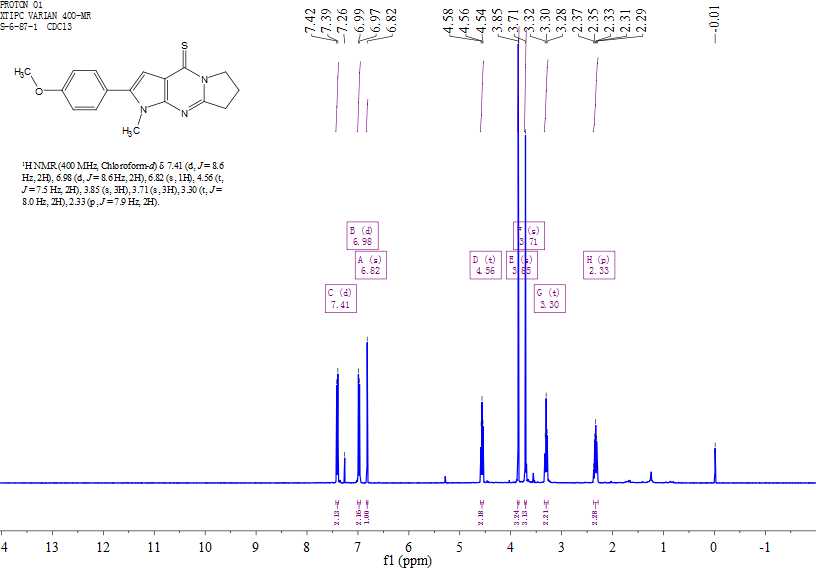


Figure S145. 1H NMR spectrum of **13v**

**
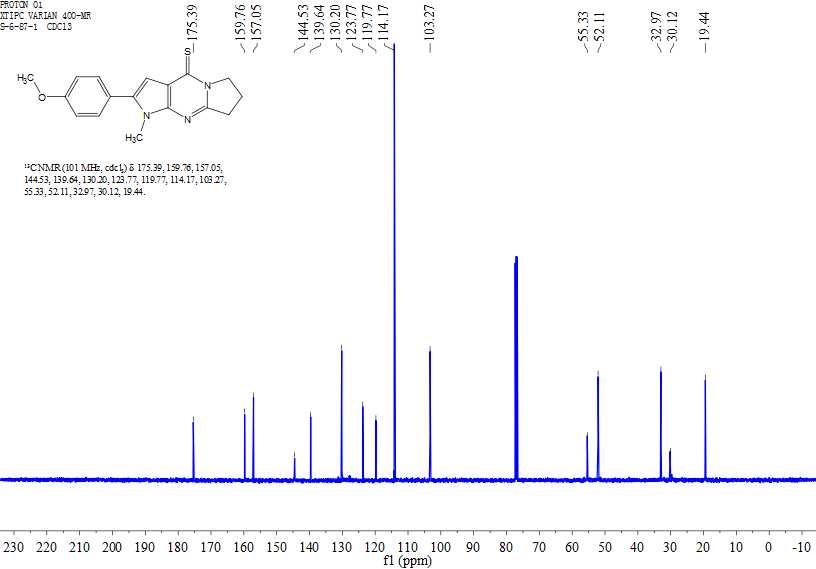
**

Figure S146. 13C NMR spectrum of **13v**

Figure S147. HRMS of **13v**

**
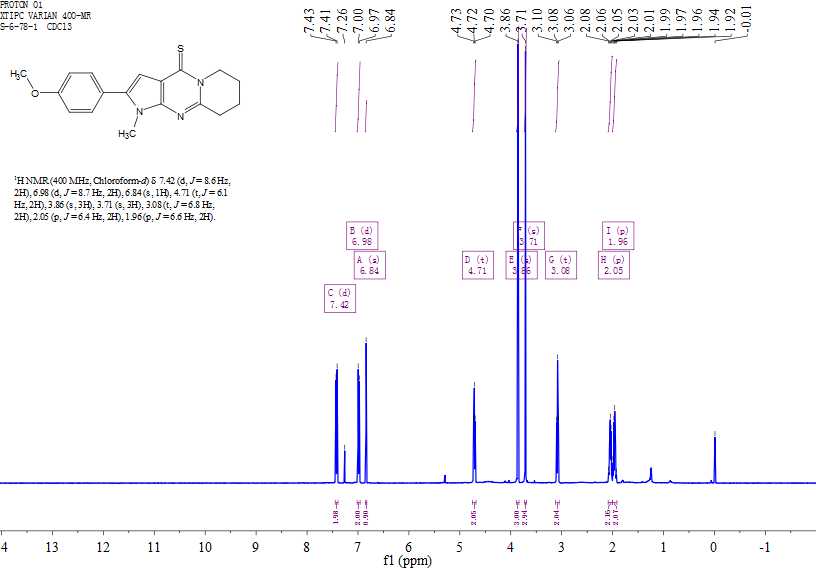
**

Figure S148. 1H NMR spectrum of **13w**

**
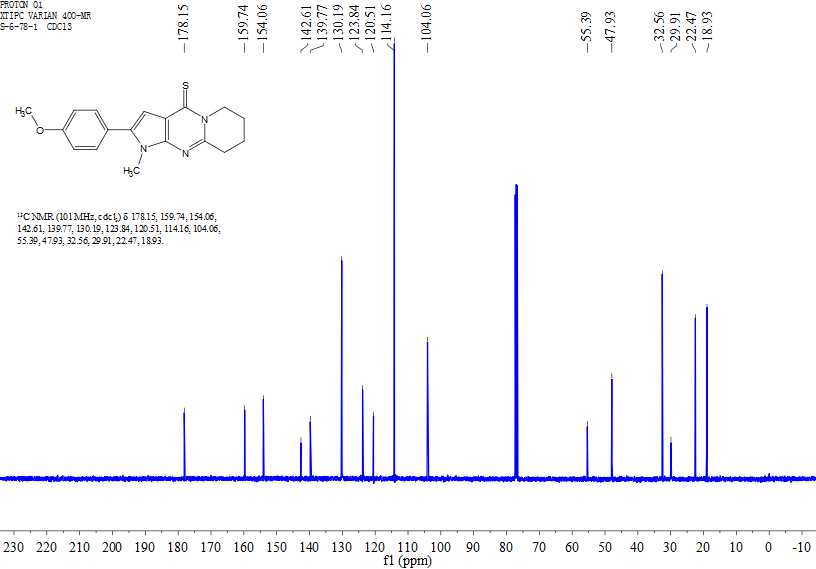
**

Figure S149. 13C NMR spectrum of **13w**

Figure S150. HRMS of **13w**

Figure S151. 1H NMR spectrum of **13x**

Figure S152. 13C NMR spectrum of **13x**

Figure S153. HRMS of **13x**

Figure S154. 1H NMR spectrum of **13y**

Figure S155. 13C NMR spectrum of **13y**

Figure S156. HRMS of **13y**

Figure S157. 1H NMR spectrum of **13z**

Figure S158. 13C NMR spectrum of **13z**

Figure S159. HRMS of **13z**

Figure S160. 1H NMR spectrum of **13aa**

Figure S161. 13C NMR spectrum of **13aa**

Figure S162. HRMS of **13aa**

1. Corresponding author. E-mail addresses: [haji@ms.xjb.ac.cn](mailto:haji@ms.xjb.ac.cn) (H.A.A.); [zhaojy@ms.xjb.ac.cn](mailto:zhaojy@ms.xjb.ac.cn) (Z.J.) [↑](#footnote-ref-1)
