# Supplementary material for: Parallel synthesis of condensed pyrimidine-thiones and their antitumor activities
Source: Research Square preprint supplement (doi:10.21203/rs.3.rs-2121388/v1), 2022-10-10
Supplement: Supplementary file 2 [file a03a676a3ee8ff1c765dd716.docx]

**TABLES**

**Table 1**. Optimization of the conditions for thionation of **6g** and **11g**.

|  | | | | | | |
| --- | --- | --- | --- | --- | --- | --- |
| **Entry** | **Thionation reagent** | **Intermediate** | **Temperature** | **Time (h)** | **Product** | **Yield (%)** |
| 1 | Lawesson's Reagent | **6g** | reflux | 12 | **12g** | 56 |
| 2 | Phosphorus pentasulfide (P2S5) | **6g** | reflux | 4 | **12g** | 74 |
| 3 | Lawesson's Reagent | **11g** | reflux | 3 | **13g** | 88 |
| 4 | Phosphorus pentasulfide (P2S5) | **11g** | reflux | 6 | **13g** | 49 |

**Table 2**. *In vitro* cytotoxic activity of the synthesized pyrimidinthiones (**12a-12aa** and **13a-13aa**)against selected cell lines

|  | | | | | | |  | | | | | | |
| --- | --- | --- | --- | --- | --- | --- | --- | --- | --- | --- | --- | --- | --- |
| **Compd.** | **R1** | **R2** | **n** | **Cell lines (IC50, µM)** | | | **Compd.** | **R1** | **R2** | **n** | **Cell lines (IC50, µM)** | | |
| **HeLa** | **MCF-7** | **HT-29** | **HeLa** | **MCF-7** | **HT-29** |
| **12a** | H | Me | 1 | ≥50 | ≥50 | ≥50 | **13a** | H | Me | 1 | ≥50 | ≥50 | ≥50 |
| **12b** | H | Me | 2 | ≥50 | ≥50 | ≥50 | **13b** | H | Me | 2 | ≥50 | ≥50 | ≥50 |
| **12c** | H | Me | 3 | ≥50 | ≥50 | ≥50 | **13c** | H | Me | 3 | ≥50 | ≥50 | ≥50 |
| **12d** | Me | Me | 1 | ≥50 | ≥50 | ≥50 | **13d** | Me | Me | 1 | ≥50 | ≥50 | ≥50 |
| **12e** | Me | Me | 2 | ≥50 | ≥50 | 40.45±2.03 | **13e** | Me | Me | 2 | ≥50 | ≥50 | ≥50 |
| **12f** | Me | Me | 3 | ≥50 | ≥50 | ≥50 | **13f** | Me | Me | 3 | ≥50 | ≥50 | ≥50 |
| **12g** | H | Ph | 1 | ≥50 | ≥50 | 17.68±0.83 | **13g** | H | Ph | 1 | ≥50 | ≥50 | ≥50 |
| **12h** | H | Ph | 2 | ≥50 | ≥50 | ≥50 | **13h** | H | Ph | 2 | ≥50 | ≥50 | ≥50 |
| **12i** | H | Ph | 3 | ≥50 | ≥50 | ≥50 | **13i** | H | Ph | 3 | 4.61±0.21 | ≥50 | 7.96±0.90 |
| **12j** | H | 4-F-Ph | 1 | ≥50 | ≥50 | ≥50 | **13j** | H | 4-F-Ph | 1 | ≥50 | ≥50 | ≥50 |
| **12k** | H | 4-F-Ph | 2 | ≥50 | ≥50 | ≥50 | **13k** | H | 4-F-Ph | 2 | ≥50 | ≥50 | ≥50 |
| **12l** | H | 4-F-Ph | 3 | ≥50 | ≥50 | ≥50 | **13l** | H | 4-F-Ph | 3 | ≥50 | ≥50 | 9.84±0.88 |
| **12m** | H | 4-Cl-Ph | 1 | ≥50 | ≥50 | ≥50 | **13m** | H | 4-Cl-Ph | 1 | ≥50 | ≥50 | ≥50 |
| **12n** | H | 4-Cl-Ph | 2 | ≥50 | ≥50 | ≥50 | **13n** | H | 4-Cl-Ph | 2 | ≥50 | ≥50 | 17.87±1.71 |
| **12o** | H | 4-Cl- Ph | 3 | ≥50 | ≥50 | ≥50 | **13o** | H | 4-Cl- Ph | 3 | ≥50 | ≥50 | 4.00±0.23 |
| **12p** | H | 4-Br-Ph | 1 | ≥50 | ≥50 | ≥50 | **13p** | H | 4-Br-Ph | 1 | 24.98±0.82 | 40.82±1.63 | ≥50 |
| **12q** | H | 4-Br-Ph | 2 | ≥50 | ≥50 | ≥50 | **13q** | H | 4-Br-Ph | 2 | ≥50 | ≥50 | ≥50 |
| **12r** | H | 4-Br-Ph | 3 | ≥50 | ≥50 | ≥50 | **13r** | H | 4-Br-Ph | 3 | ≥50 | ≥50 | 2.78±0.21 |
| **12s** | H | 4-Me-Ph | 1 | ≥50 | ≥50 | ≥50 | **13s** | H | 4-Me-Ph | 1 | 35.74±1.03 | ≥50 | ≥50 |
| **12t** | H | 4-Me-Ph | 2 | ≥50 | ≥50 | ≥50 | **13t** | H | 4-Me-Ph | 2 | ≥50 | ≥50 | 3.52±0.31 |
| **12u** | H | 4-Me-Ph | 3 | ≥50 | ≥50 | ≥50 | **13u** | H | 4-Me-Ph | 3 | ≥50 | 26.99±0.57 | 10.32±0.63 |
| **12v** | H | 4-OMe-Ph | 1 | ≥50 | ≥50 | ≥50 | **13v** | H | 4-OMe-Ph | 1 | ≥50 | ≥50 | ≥50 |
| **12w** | H | 4-OMe-Ph | 2 | ≥50 | ≥50 | ≥50 | **13w** | H | 4-OMe-Ph | 2 | ≥50 | ≥50 | 19.47±1.39 |
| **12x** | H | 4-OMe-Ph | 3 | ≥50 | ≥50 | ≥50 | **13x** | H | 4-OMe-Ph | 3 | ≥50 | ≥50 | 22.56±1.60 |
| **12y** | H | 4-CF3-Ph | 1 | ≥50 | ≥50 | ≥50 | **13y** | H | 4-CF3-Ph | 1 | 9.07±0.18 | ≥50 | ≥50 |
| **12z** | H | 4-CF3-Ph | 2 | ≥50 | ≥50 | ≥50 | **13z** | H | 4-CF3-Ph | 2 | 7.01±0.15 | 94.29±2.55 | 2.66±0.17 |
| **12aa** | H | 4-CF3-Ph | 3 | ≥50 | ≥50 | ≥50 | **13aa** | H | 4-CF3-Ph | 3 | 20.25±0.77 | ≥50 | 2.09±0.22 |
| **DOX** | − | − | − | 0.57±0.016 | 0.18±0.011 | 0.82±0.029 | **DOX** | − | − | − | 0.57±0.016 | 0.18±0.011 | 0.82±0.029 |
